# Supplementary material
Source: publisher figshare collection journal article supplement (https://wiley.figshare.com/articles/dataset/_/3520142)
Supplement: Supplementary file 1 [file 1]

Zhenhua Luo, Zhigang Jiang, and Songhua Tang. Impacts of climate change on distributions and diversity of ungulates on the Tibetan Plateau. *Ecological Applications*.

Appendix B. Occurrence records, Jack-knife analysis result, and distributional predictions of single species for the current, 2020, 2050 and, 2080 under the full and zero dispersal hypotheses.

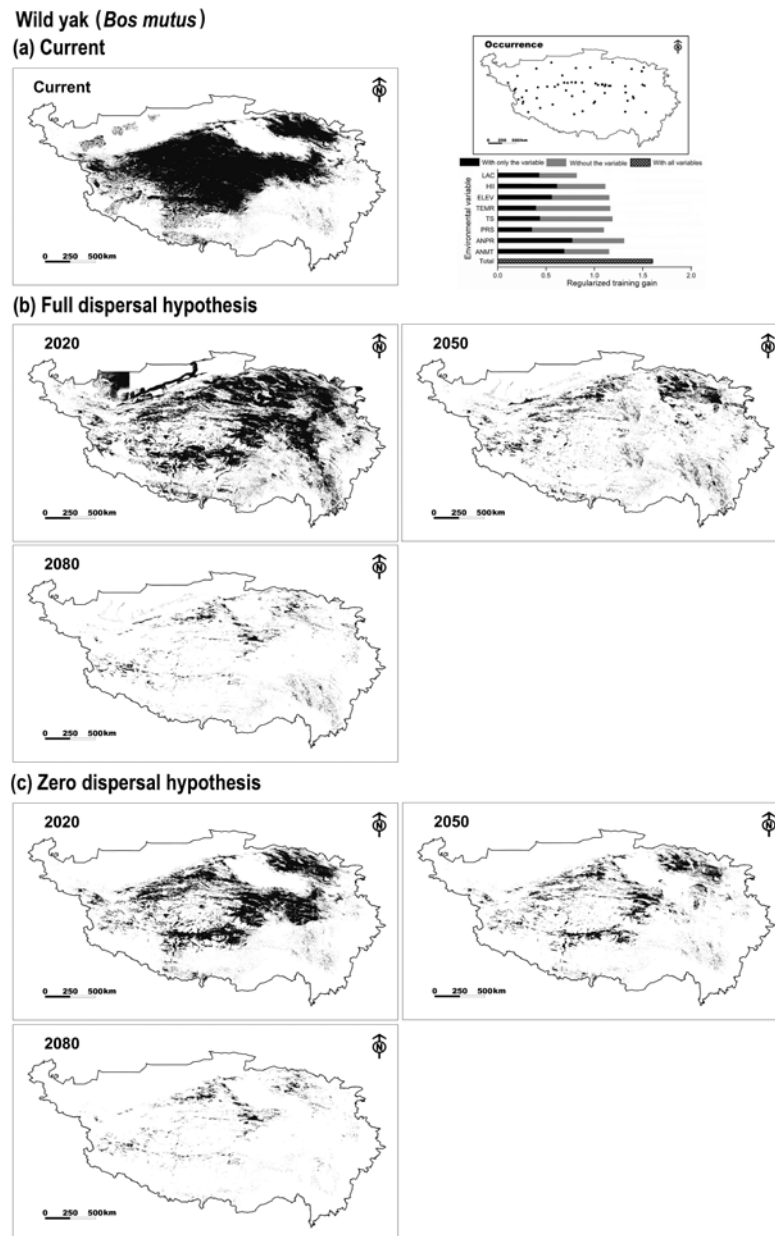

FIG. B1. Occurrence records, Jack-knife analysis, and potential current and future distributions under full and zero dispersal hypotheses of wild yak (*Bos mutus*).

## Takin (*Budorcas taxicolor*)

### (a) Current

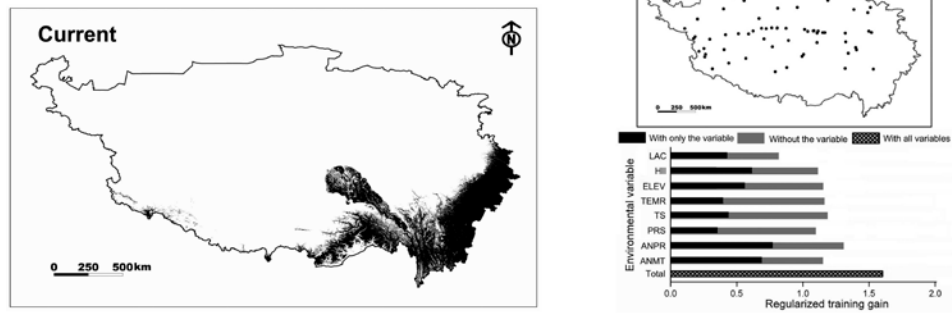

### (b) Full dispersal hypothesis

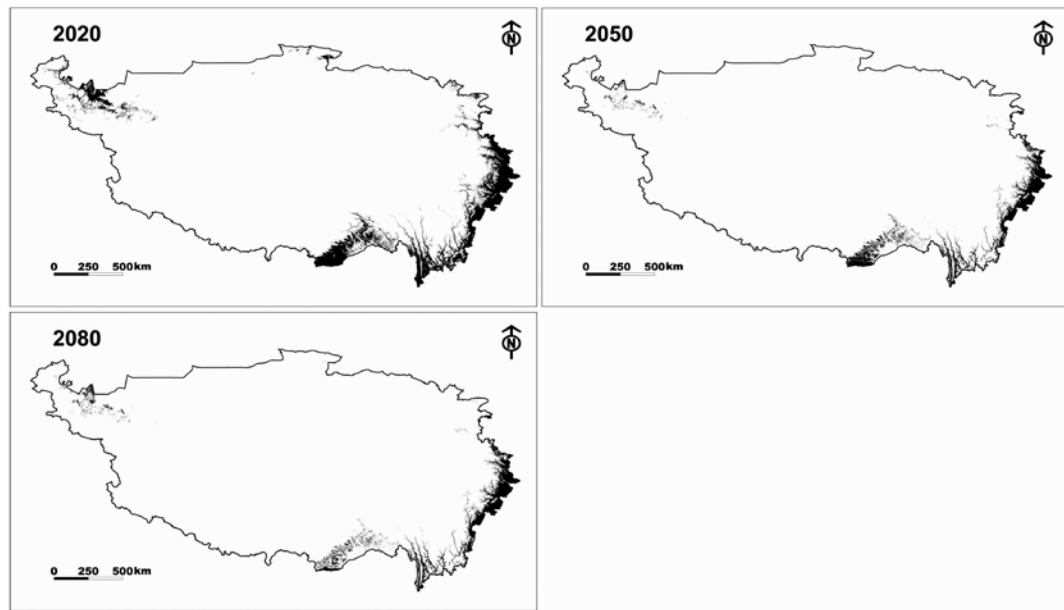

### (c) Zero dispersal hypothesis

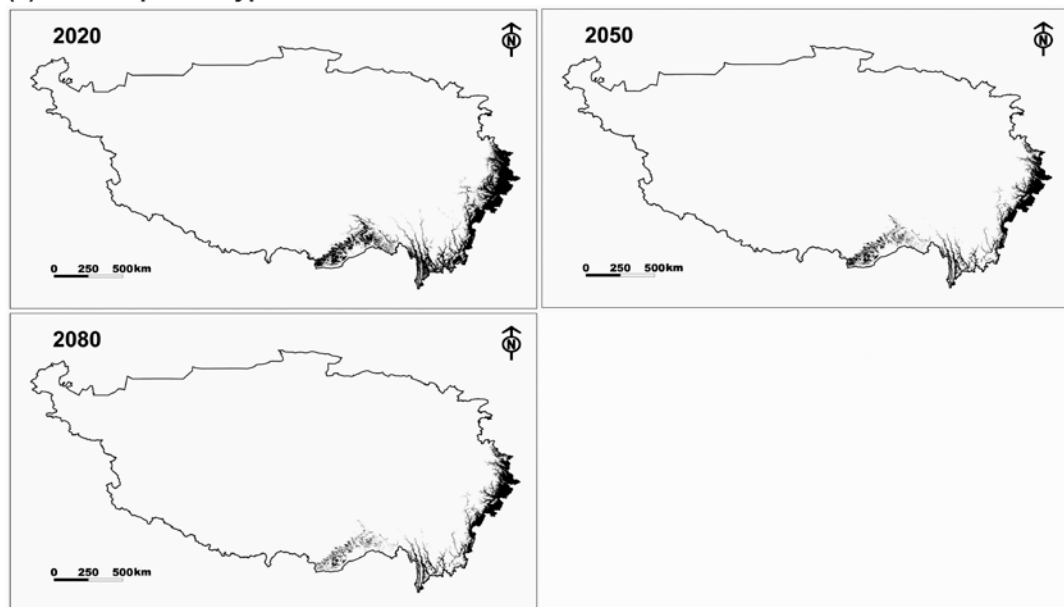

FIG. B2. Occurrence records, Jack-knife analysis, and potential current and future distributions under full and zero dispersal hypotheses of takin (*Budorcas taxicolor*).

## Eastern roe deer (*Capreolus pygargus*)

### (a) Current

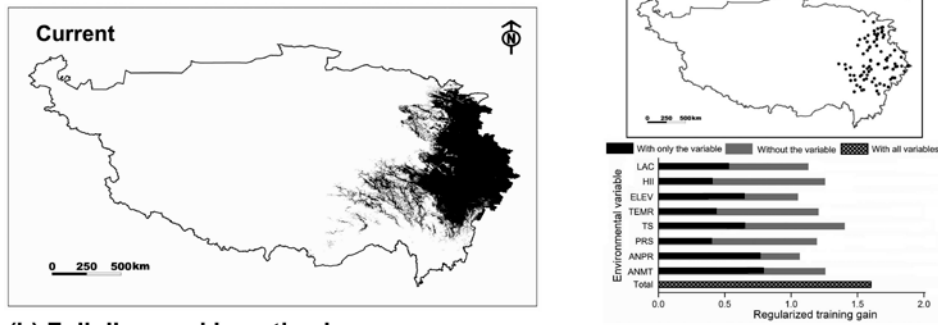

### (b) Full dispersal hypothesis

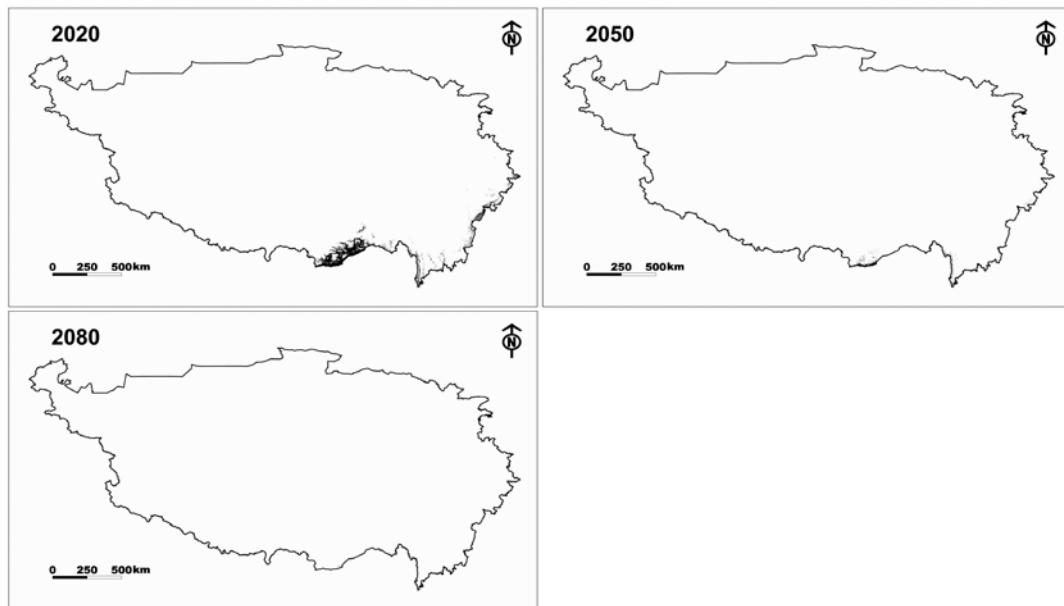

### (c) Zero dispersal hypothesis

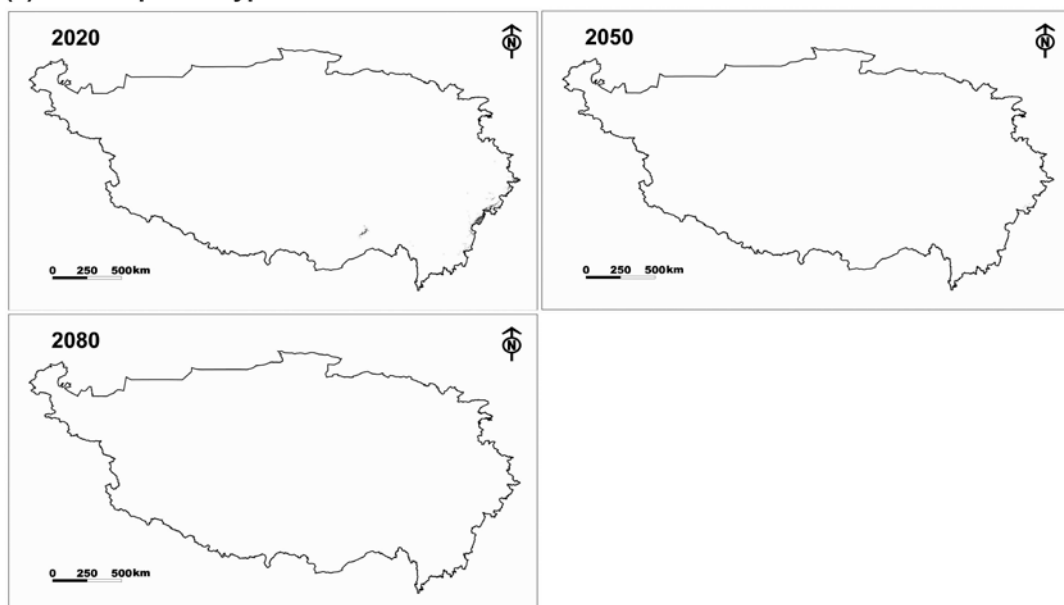

FIG. B3. Occurrence records, Jack-knife analysis, and potential current and future distributions under full and zero dispersal hypotheses of eastern roe deer (*Capreolus pygargus*).

# Thorold's deer (*Cervus albirostris*)

## (a) Current

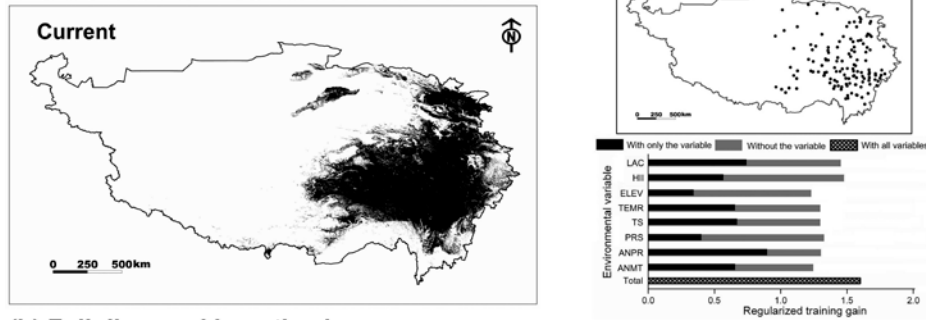

## (b) Full dispersal hypothesis

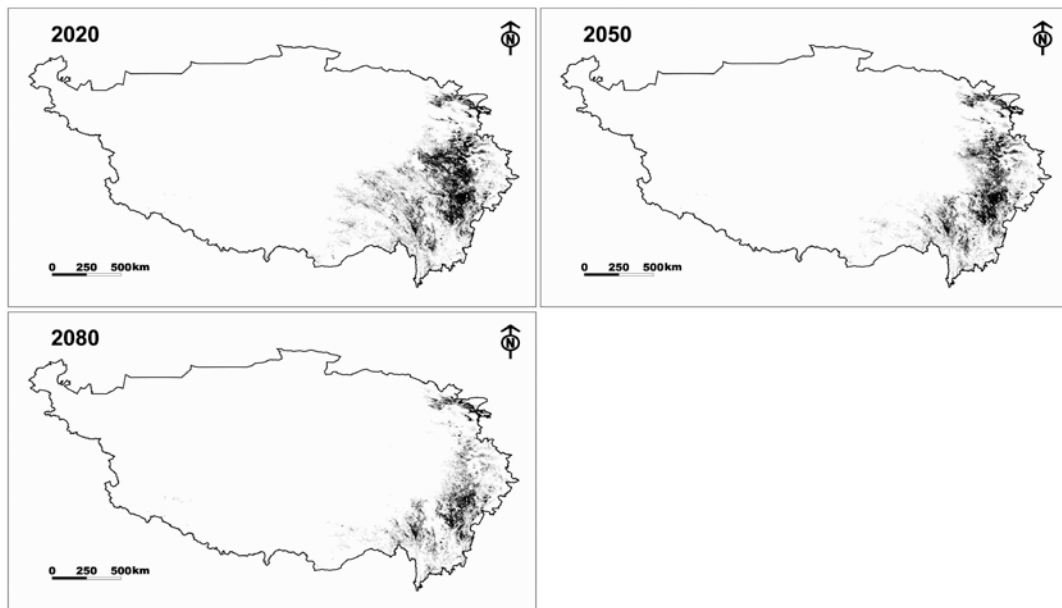

## (c) Zero dispersal hypothesis

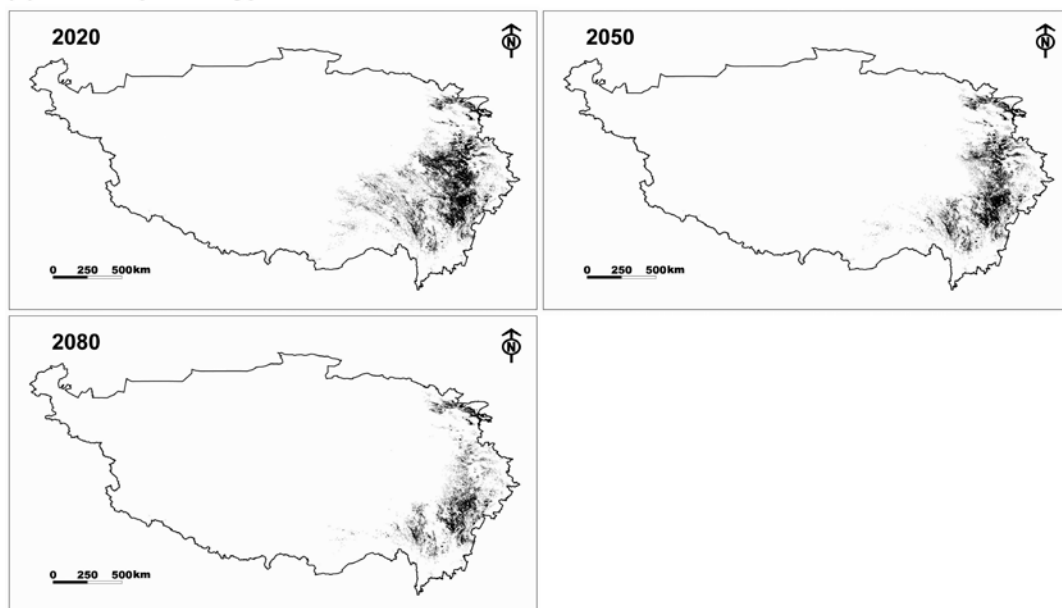

FIG. B4. Occurrence records, Jack-knife analysis, and potential current and future distributions under full and zero dispersal hypotheses of Thorold's deer (*Cervus albirostris*).

## Red deer (*Cervus elaphus*)

### (a) Current

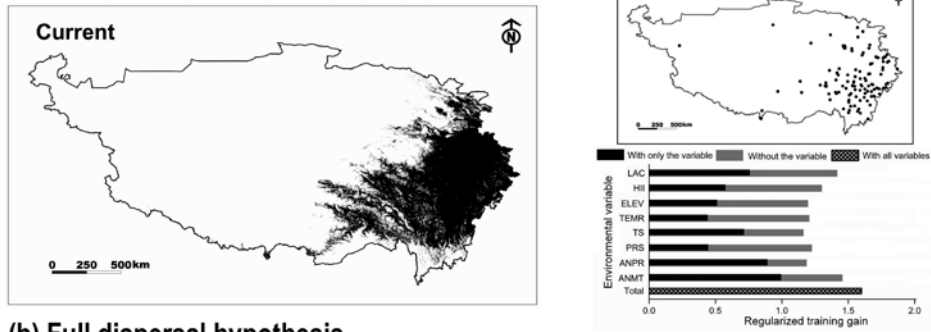

### (b) Full dispersal hypothesis

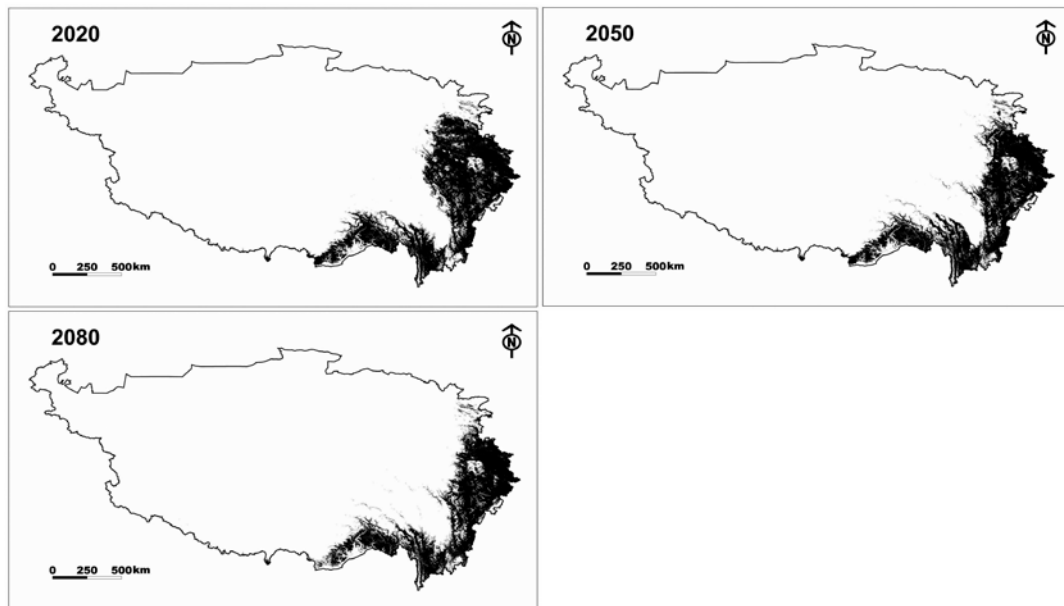

### (c) Zero dispersal hypothesis

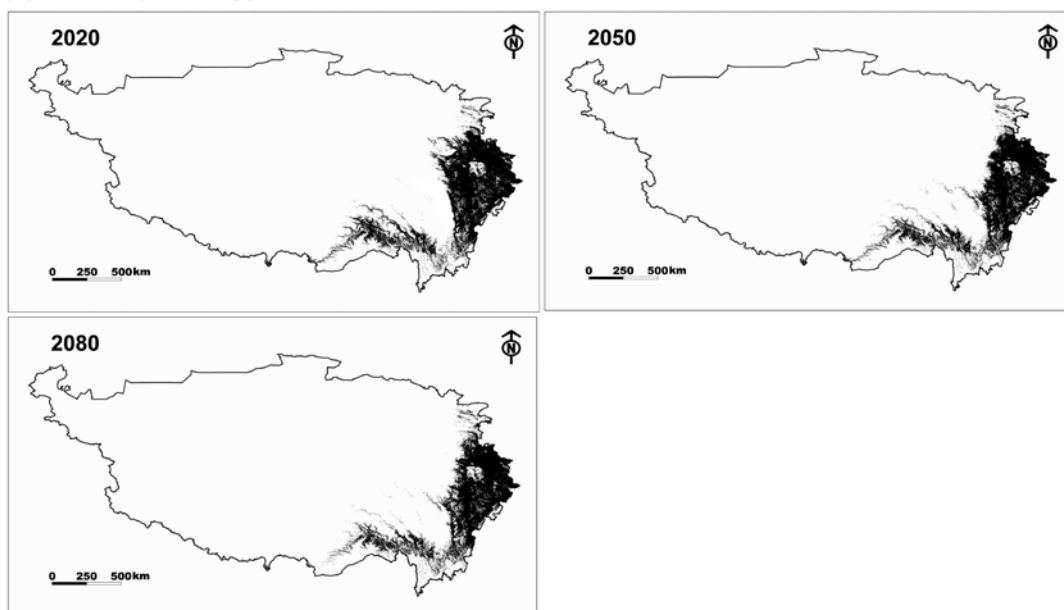

FIG. B5. Occurrence records, Jack-knife analysis, and potential current and future distributions under full and zero dispersal hypotheses of red deer (*Cervus elaphus*).

# Sika deer (*Cervus nippon*)

## (a) Current

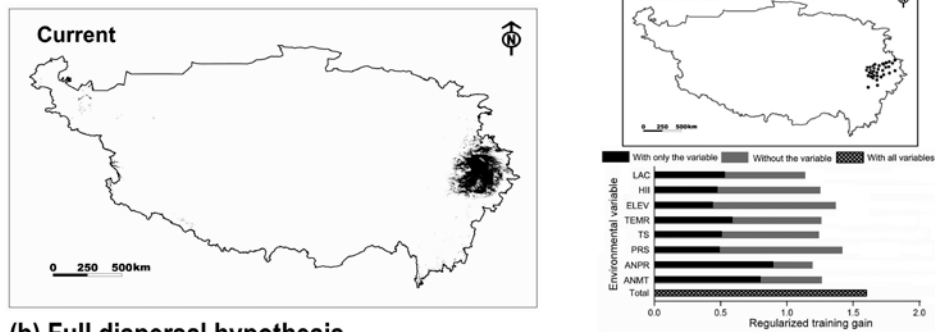

## (b) Full dispersal hypothesis

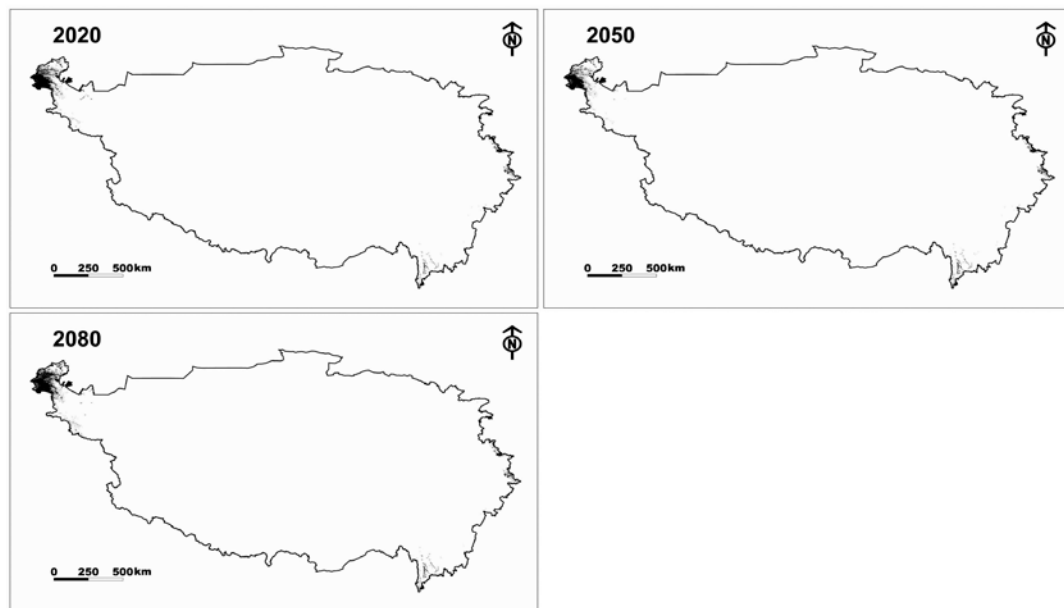

## (c) Zero dispersal hypothesis

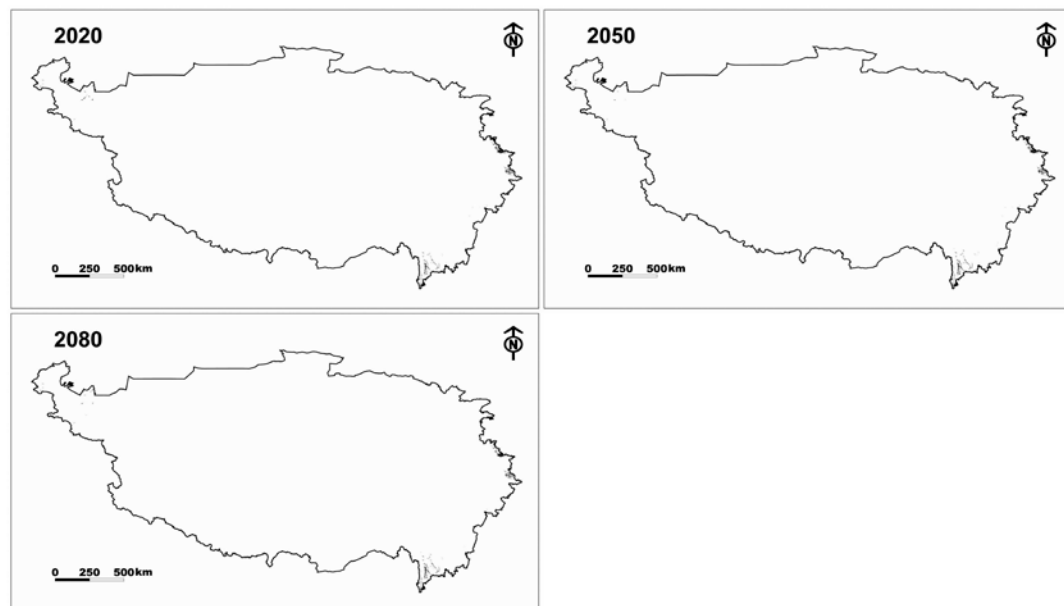

FIG. B6. Occurrence records, Jack-knife analysis, and potential current and future distributions under full and zero dispersal hypotheses of sika deer (*Cervus nippon*).

## Sambar (*Cervus unicolor*)

### (a) Current

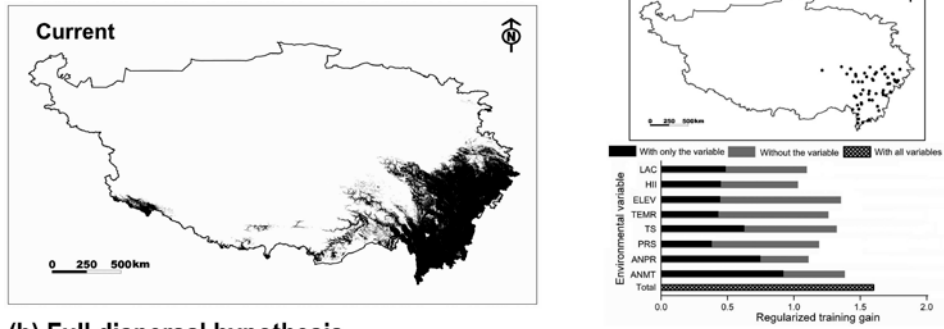

### (b) Full dispersal hypothesis

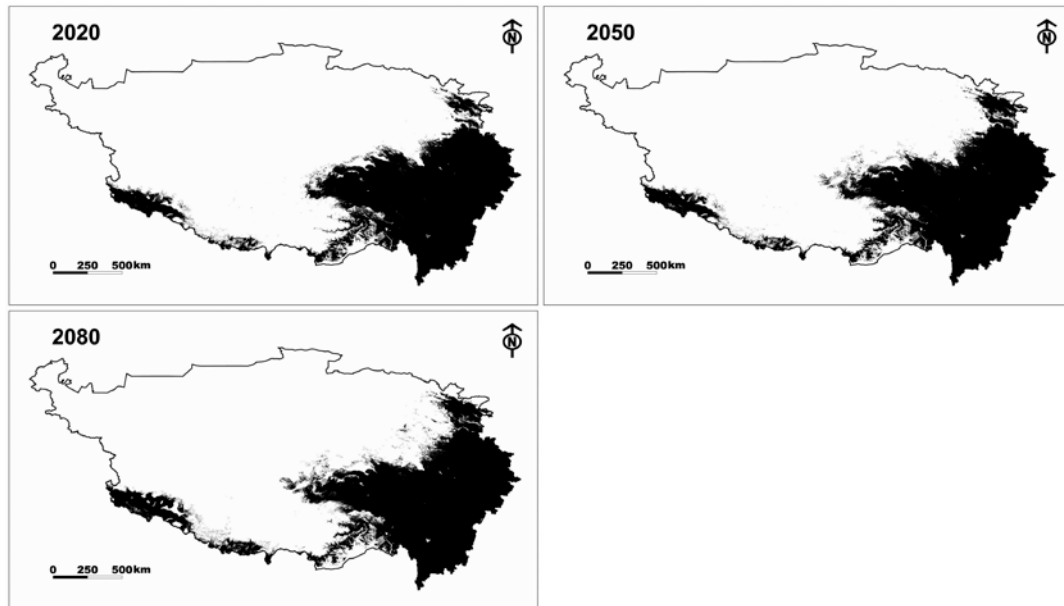

### (c) Zero dispersal hypothesis

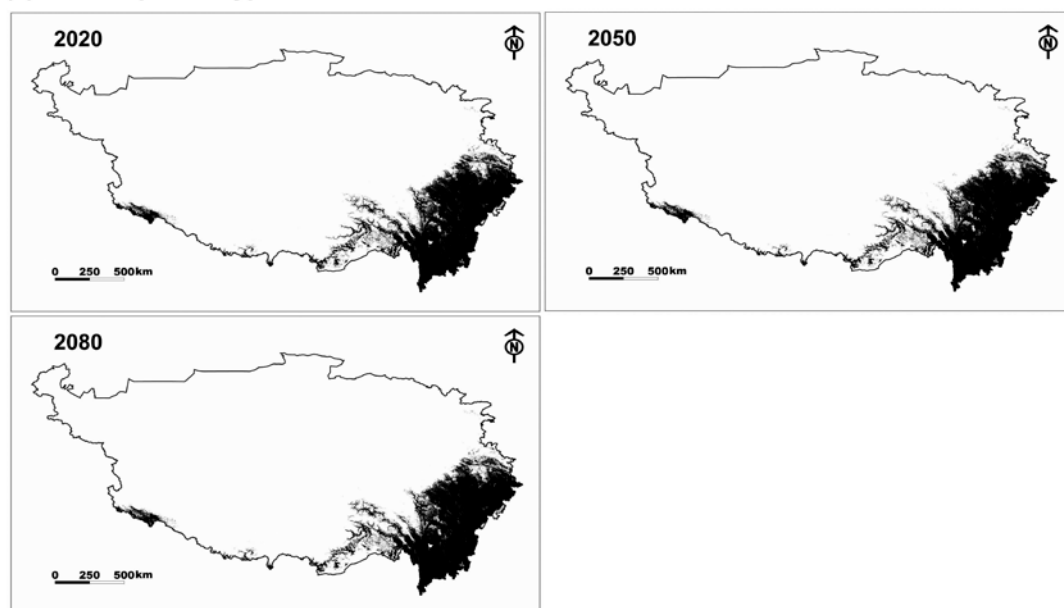

FIG. B7. Occurrence records, Jack-knife analysis, and potential current and future distributions under full and zero dispersal hypotheses of sambar (*Cervus unicolor*).

# Tufted deer (*Elaphodus cephalophus*)

## (a) Current

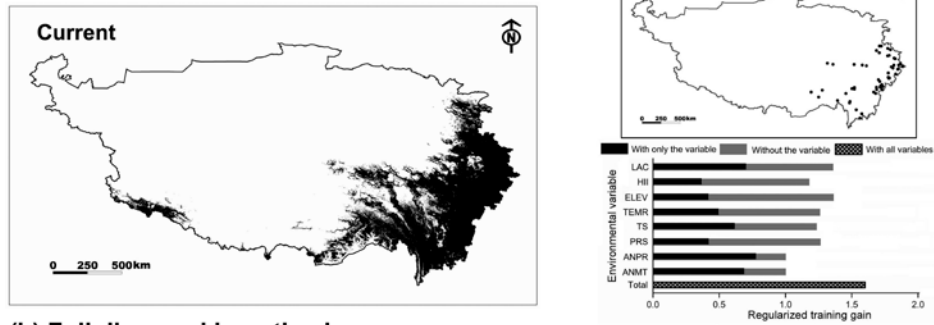

## (b) Full dispersal hypothesis

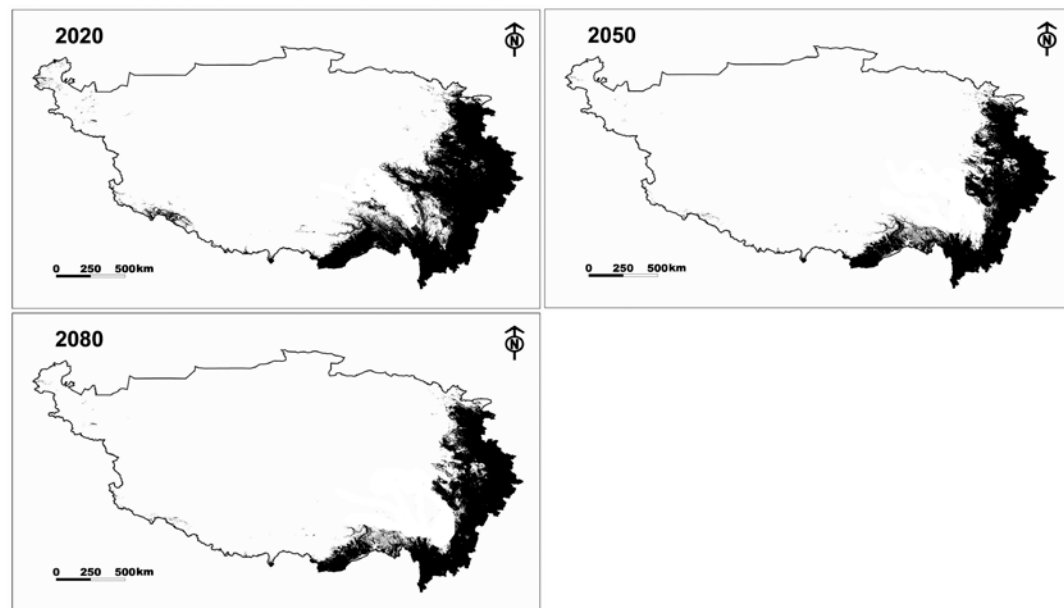

## (c) Zero dispersal hypothesis

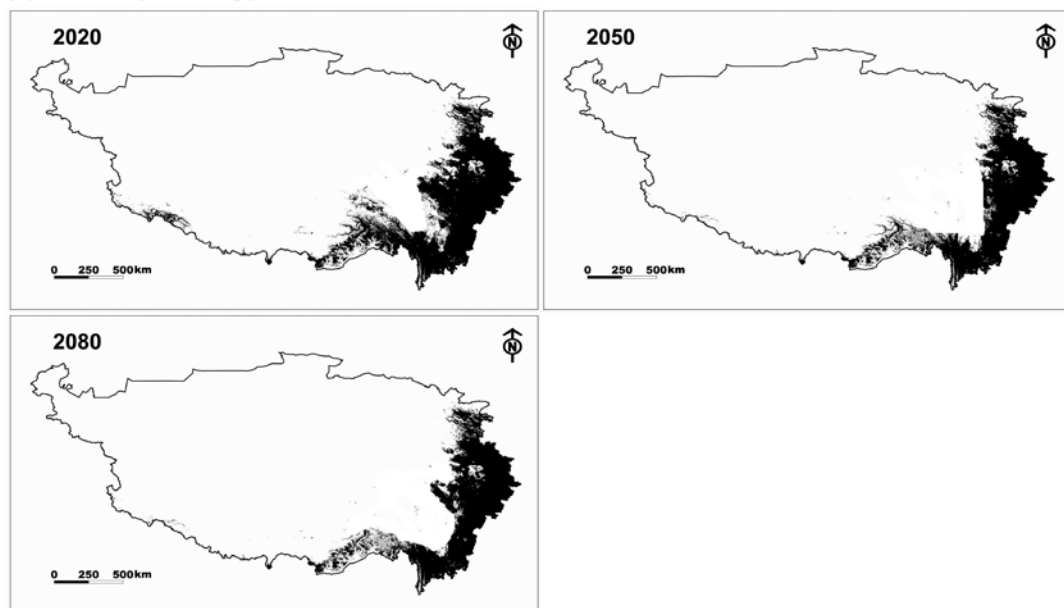

FIG. B8. Occurrence records, Jack-knife analysis, and potential current and future distributions under full and zero dispersal hypotheses of tufted deer (*Elaphodus cephalophus*).

# Kiang (*Equus kiang*)

## (a) Current

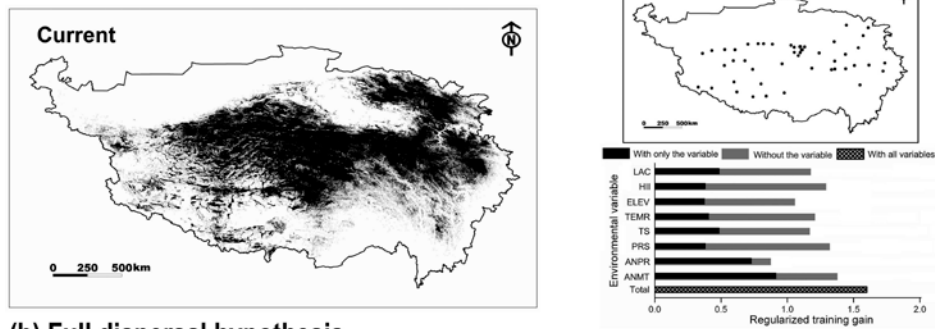

## (b) Full dispersal hypothesis

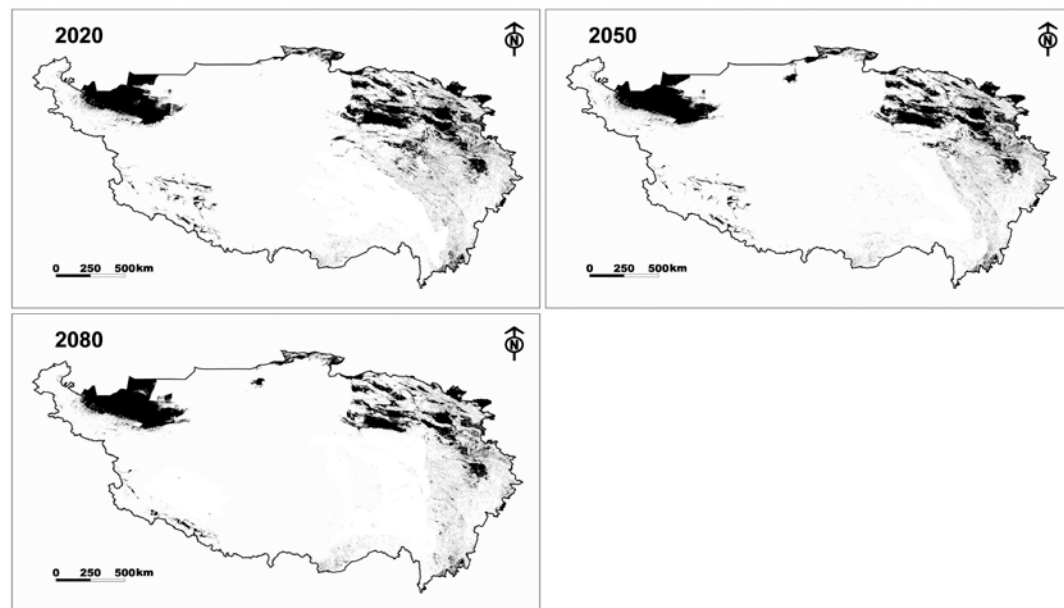

## (c) Zero dispersal hypothesis

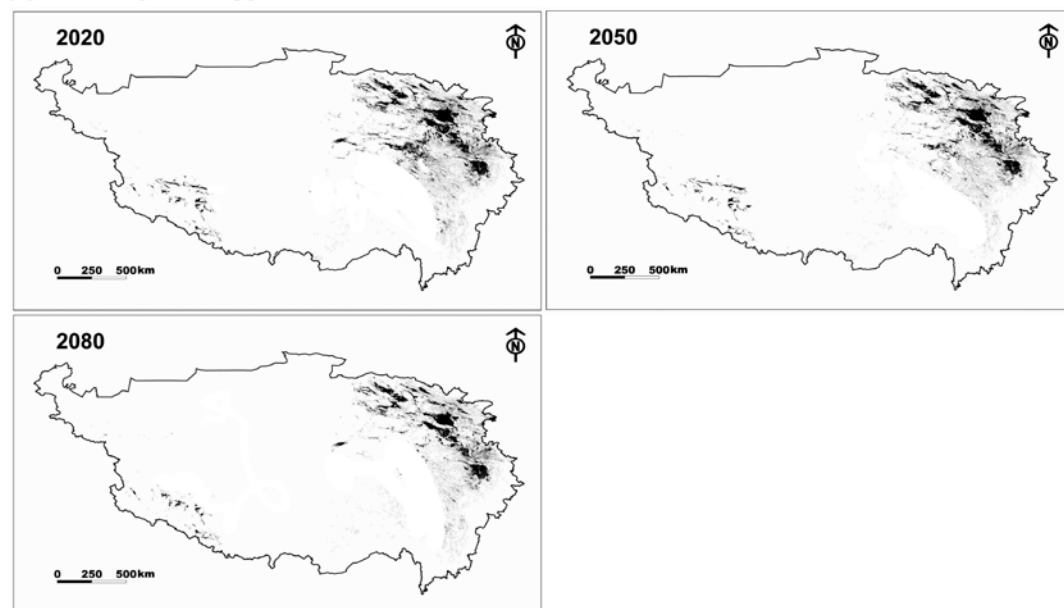

FIG. B9. Occurrence records, Jack-knife analysis, and potential current and future distributions under full and zero dispersal hypotheses of kiang (*Equus kiang*).

# Goitered gazelle (*Gazella subgutturosa*)

## (a) Current

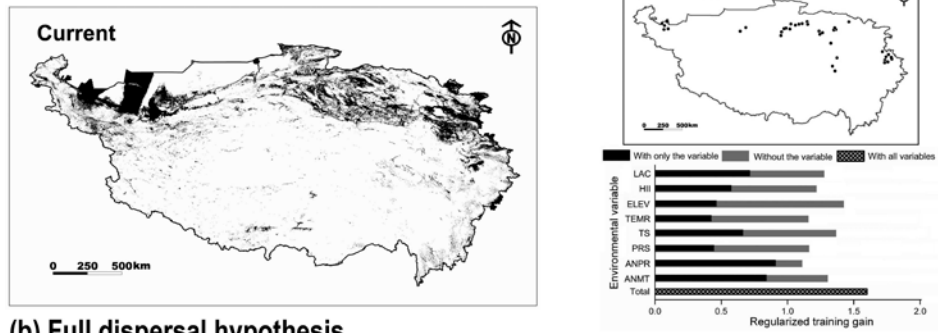

## (b) Full dispersal hypothesis

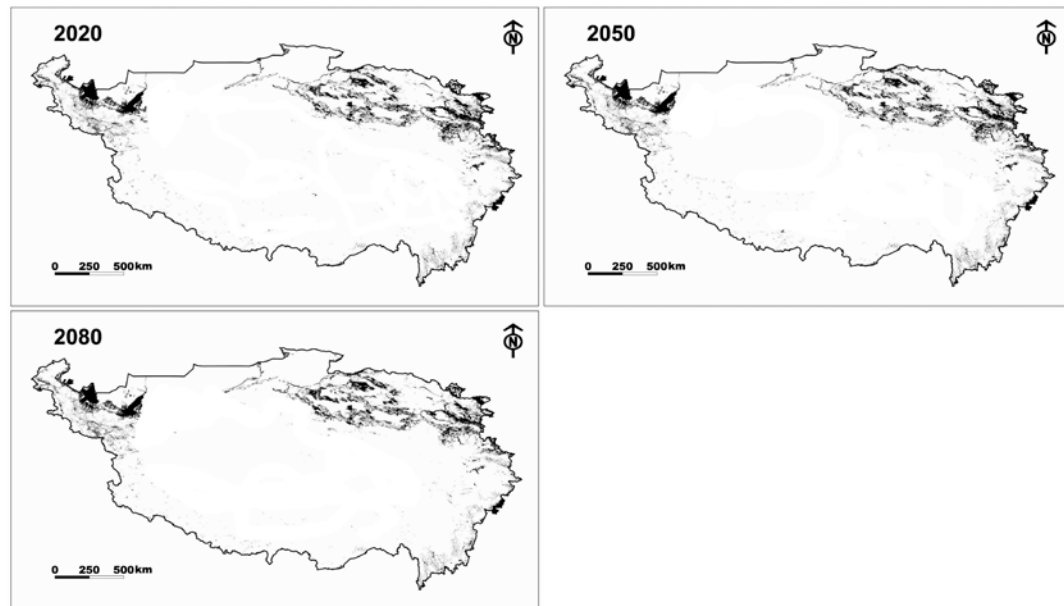

## (c) Zero dispersal hypothesis

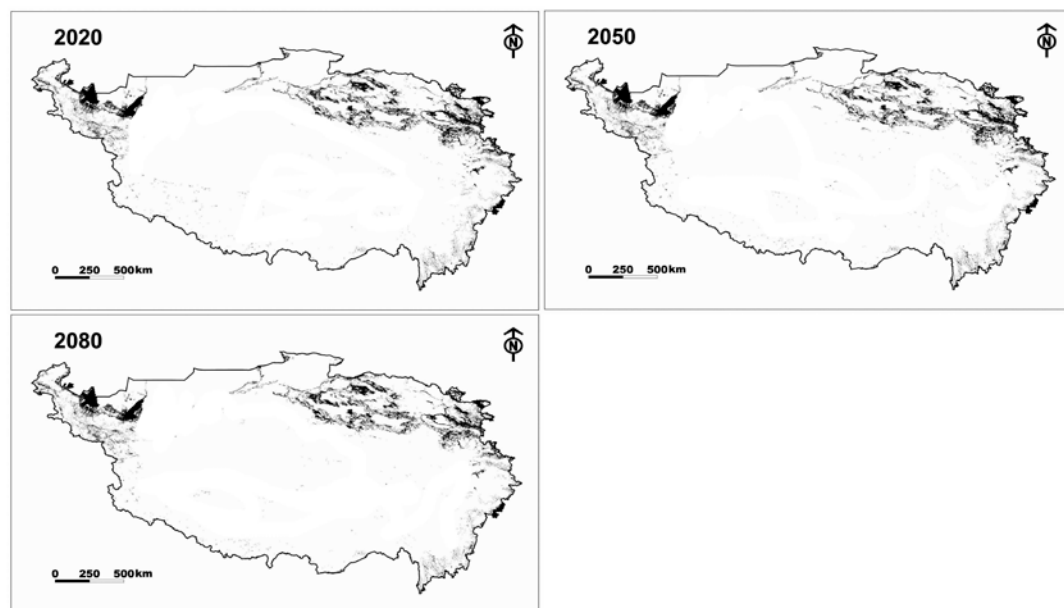

FIG. B10. Occurrence records, Jack-knife analysis, and potential current and future distributions under full and zero dispersal hypotheses of goitered gazelle (*Gazella subgutturosa*).

# Chinese forest musk deer (*Moschus berezovskii*)

## (a) Current

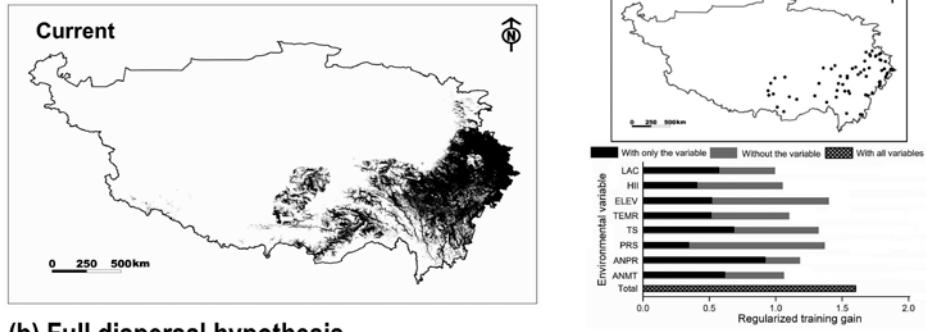

## (b) Full dispersal hypothesis

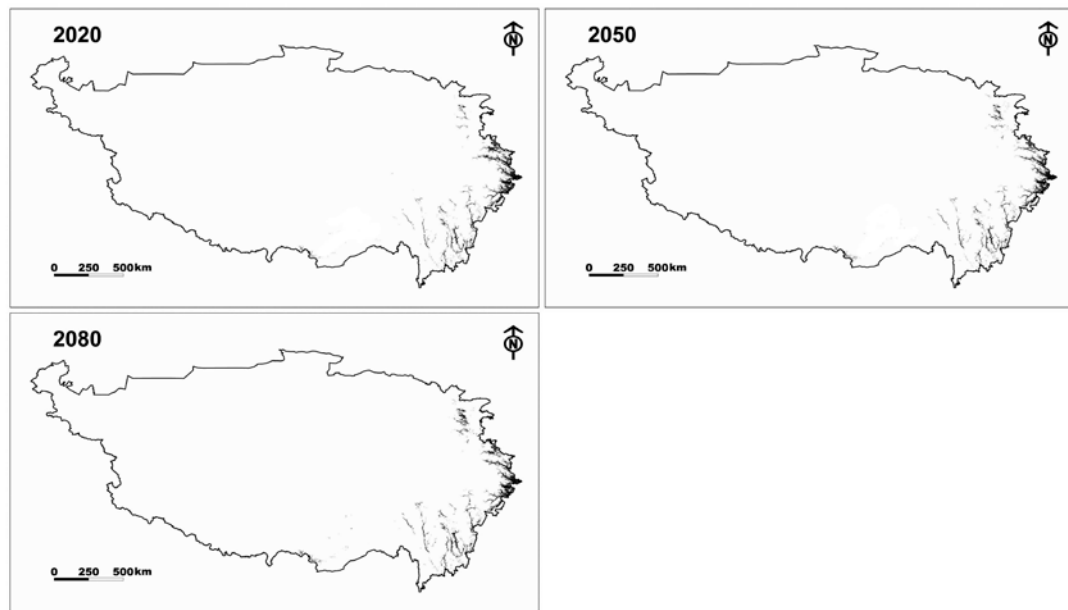

## (c) Zero dispersal hypothesis

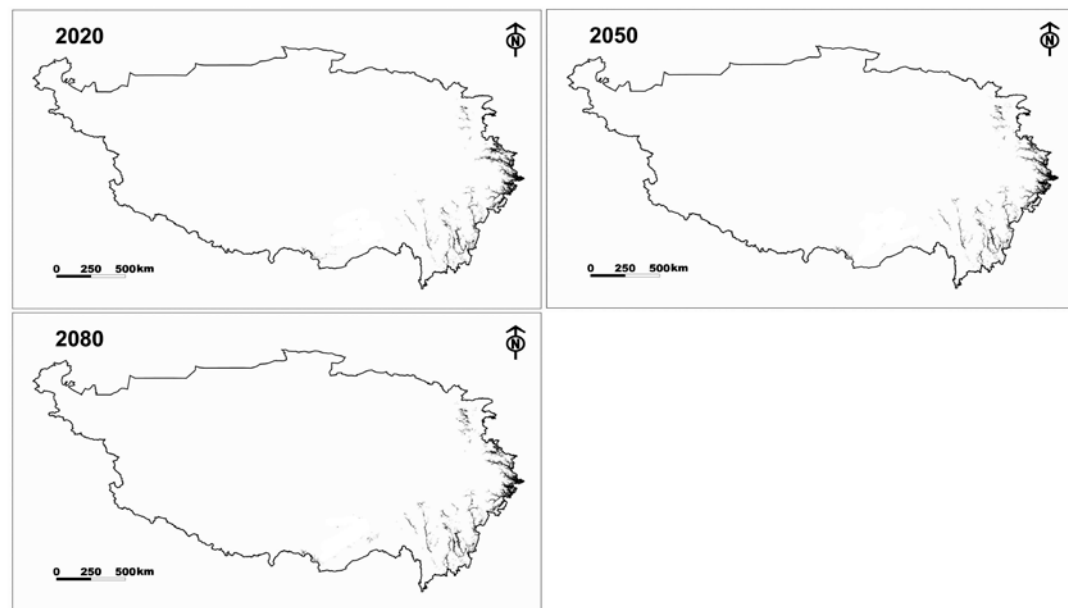

FIG. B11. Occurrence records, Jack-knife analysis, and potential current and future distributions under full and zero dispersal hypotheses of Chinese forest musk deer (*Moschus berezovskii*).

## Alpine musk deer (*Moschus chrysogaster*)

### (a) Current

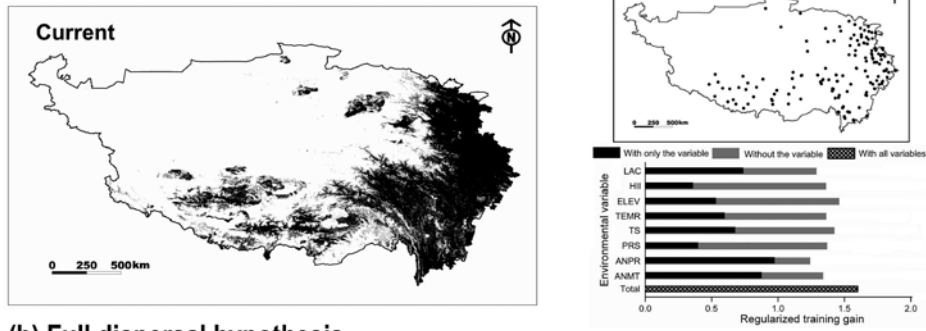

### (b) Full dispersal hypothesis

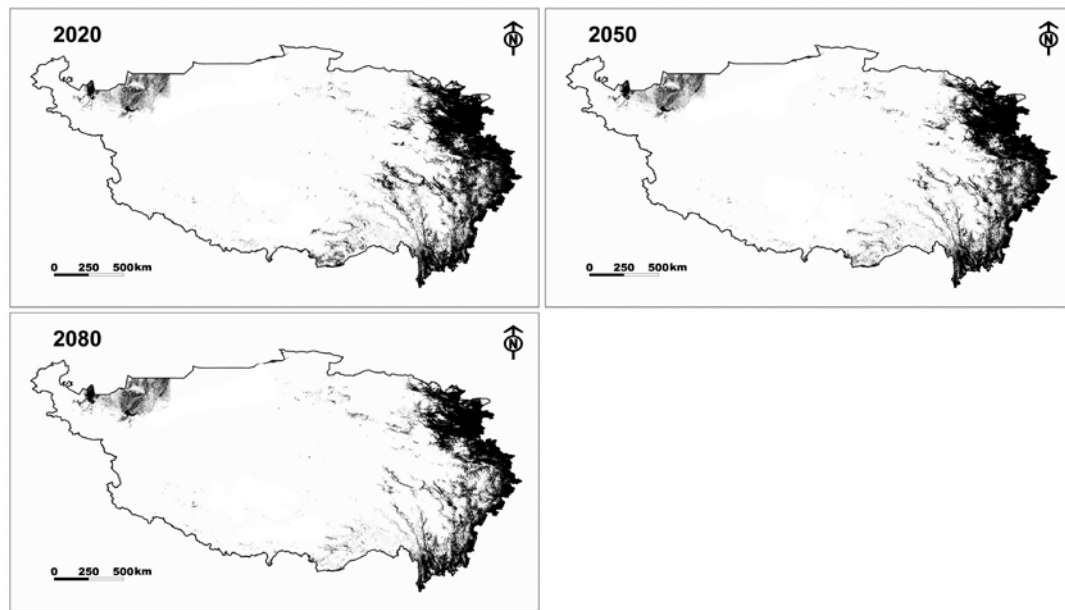

### (c) Zero dispersal hypothesis

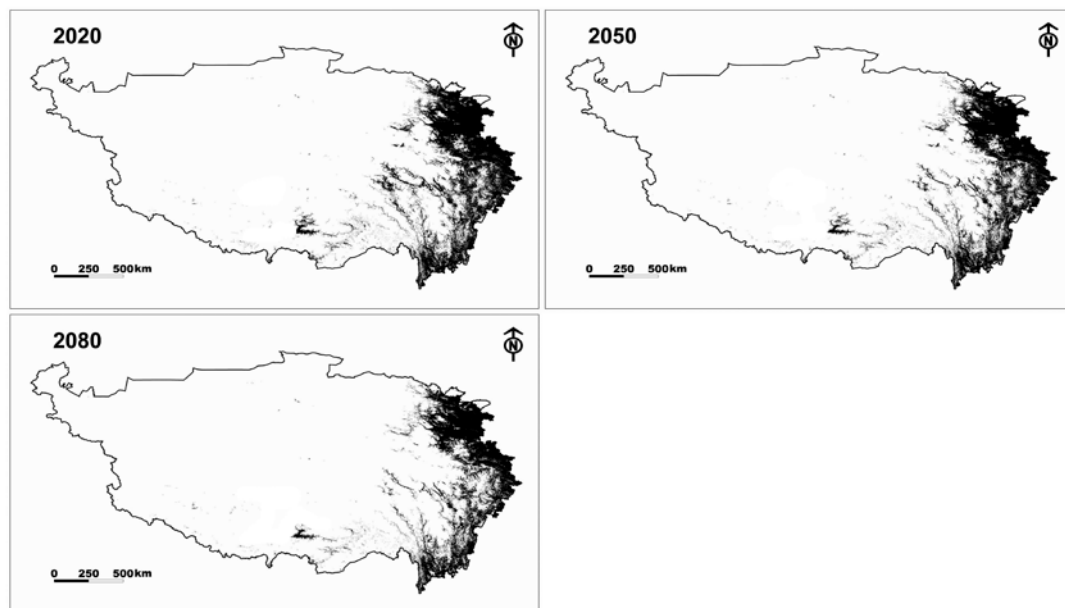

FIG. B12. Occurrence records, Jack-knife analysis, and potential current and future distributions under full and zero dispersal hypotheses of Alpine musk deer (*Moschus chrysogaster*).

# Reeves's muntjac (*Muntiacus reevesi*)

## (a) Current

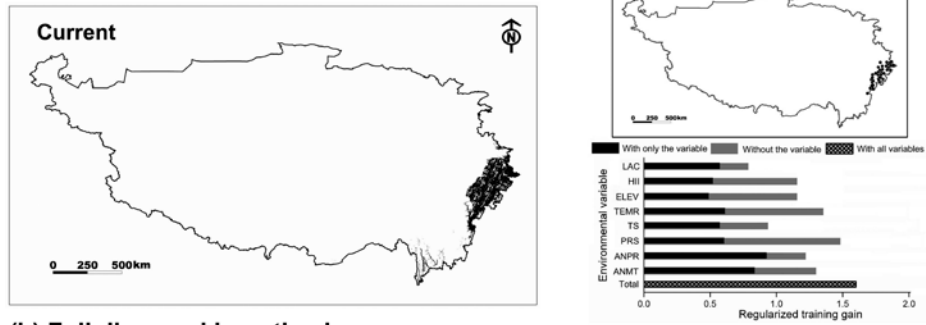

## (b) Full dispersal hypothesis

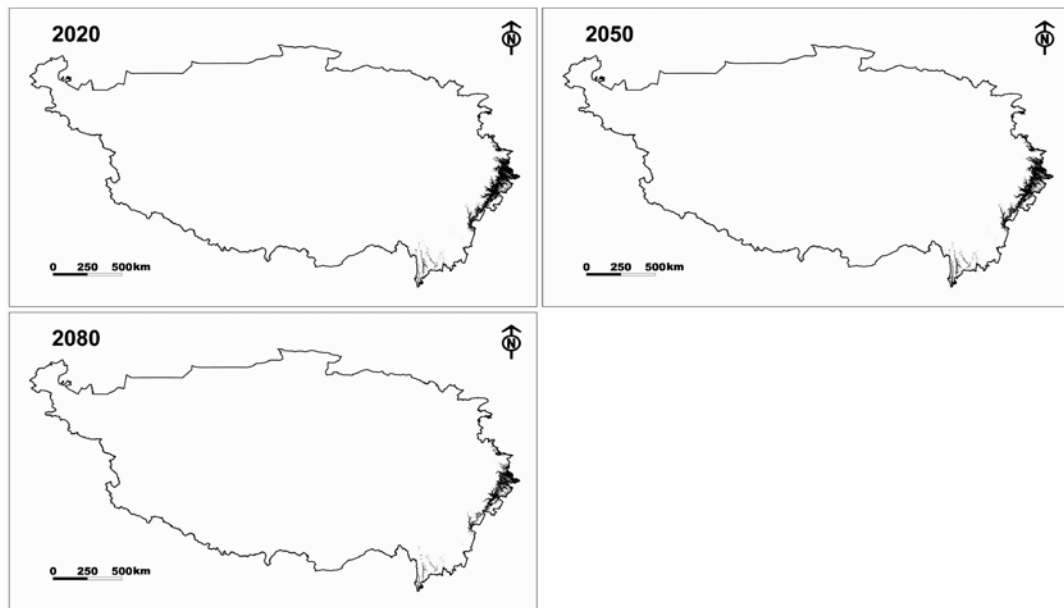

## (c) Zero dispersal hypothesis

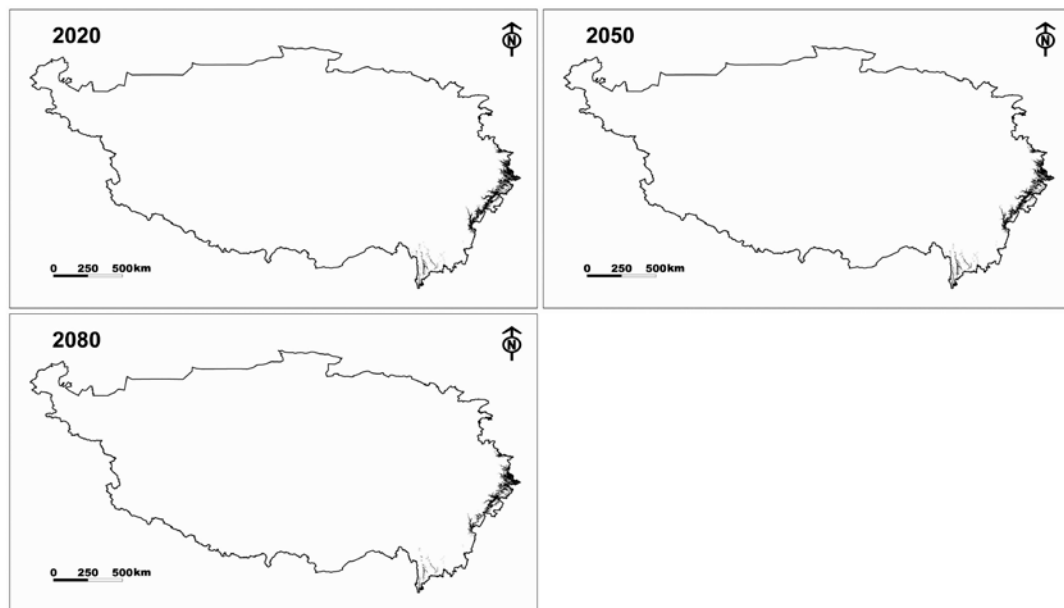

FIG. B13. Occurrence records, Jack-knife analysis, and potential current and future distributions under full and zero dispersal hypotheses of Reeves's muntjac (*Muntiacus reevesi*).

# Chinese goral (*Naemorhaedus caudatus*)

## (a) Current

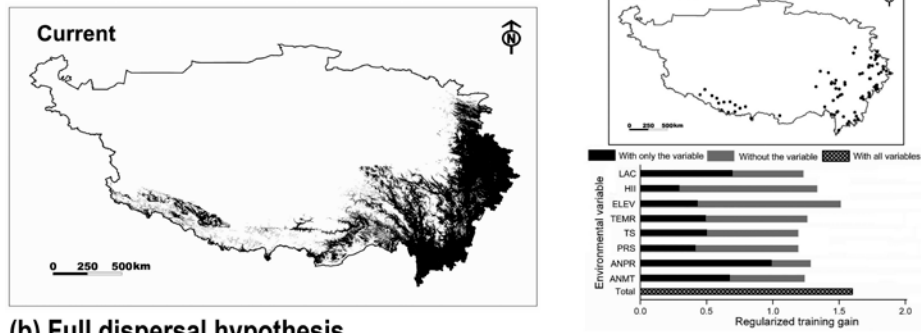

## (b) Full dispersal hypothesis

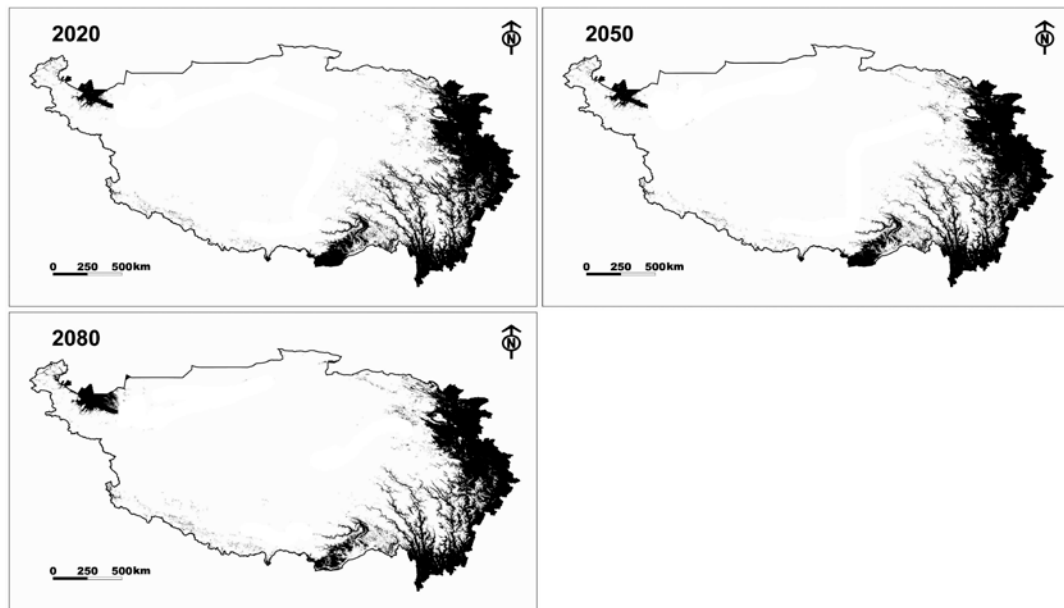

## (c) Zero dispersal hypothesis

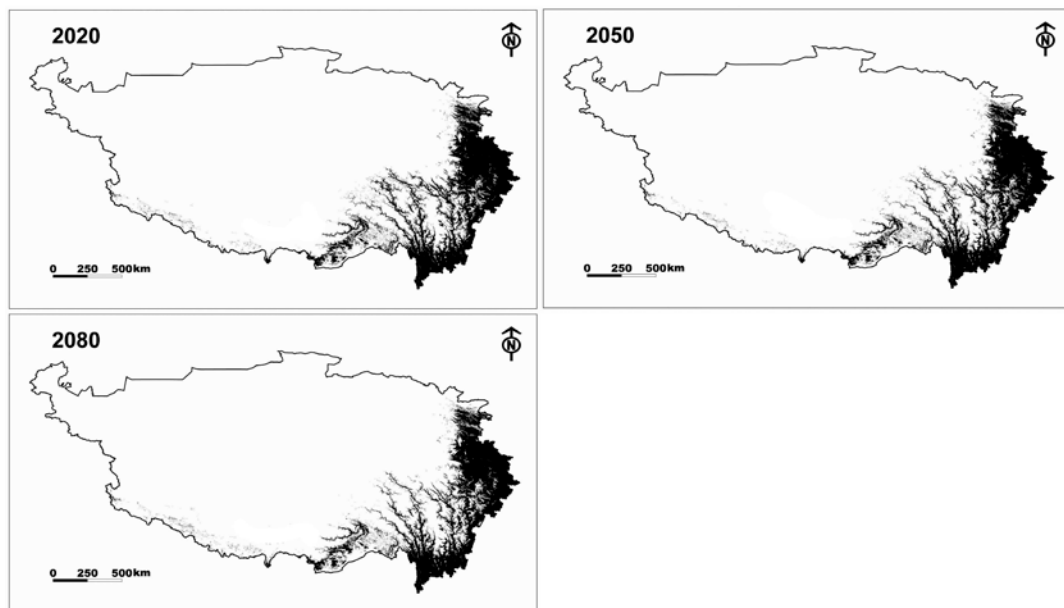

FIG. B14. Occurrence records, Jack-knife analysis, and potential current and future distributions under full and zero dispersal hypotheses of Chinese goral (*Naemorhedus caudatus*).

# **Serow (*Naemorhaedus sumatraensis*)**

## **(a) Current**

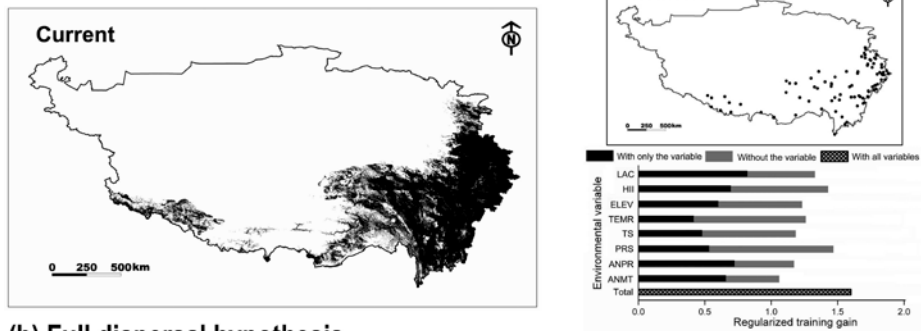

## **(b) Full dispersal hypothesis**

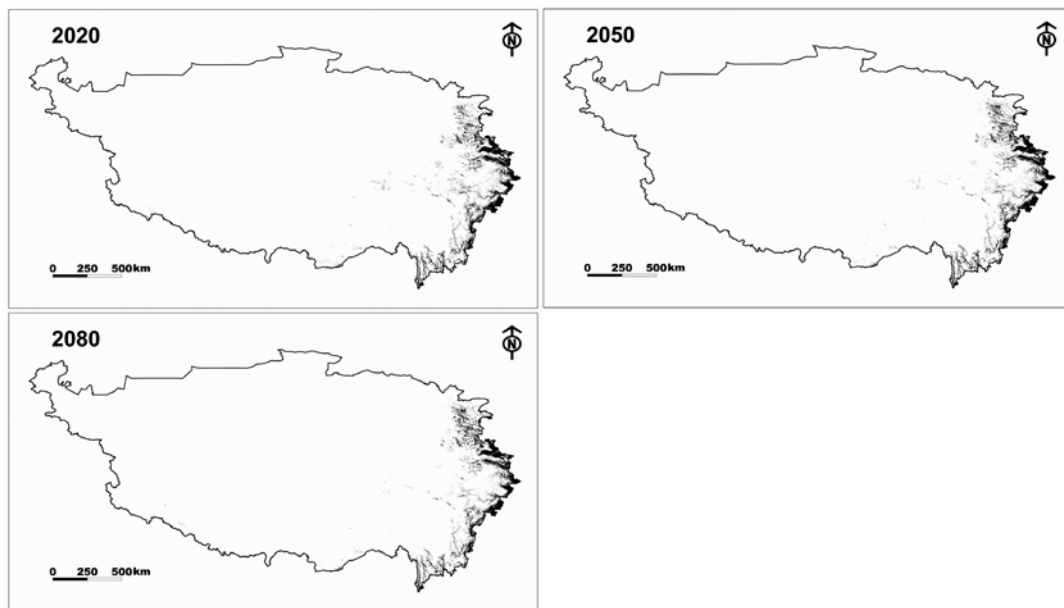

## **(c) Zero dispersal hypothesis**

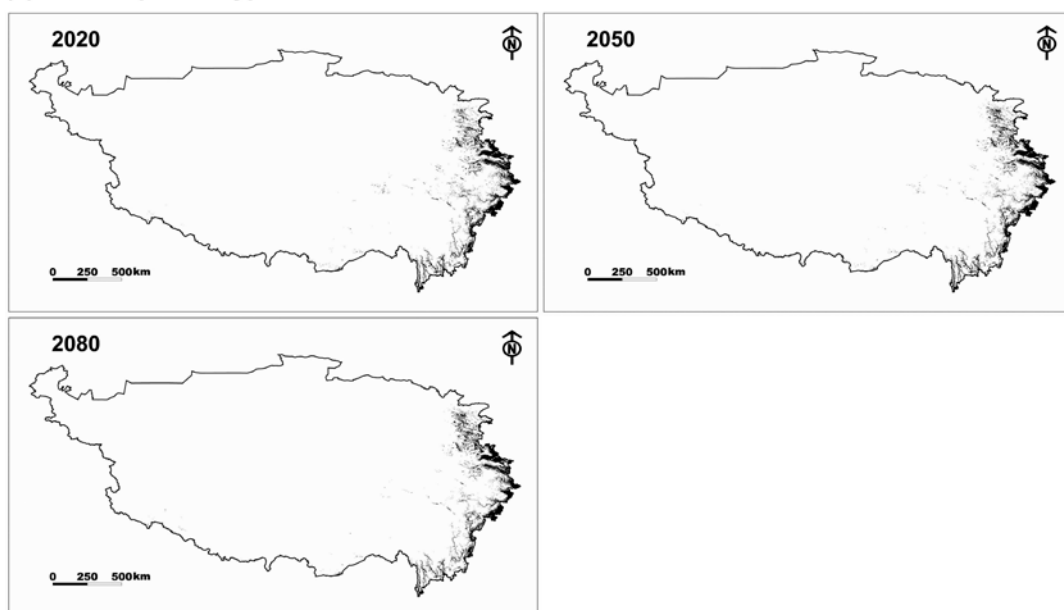

FIG. B15. Occurrence records, Jack-knife analysis, and potential current and future distributions under full and zero dispersal hypotheses of Serow (*Naemorhedus sumatraensis*).

# Argali (*Ovis ammon*)

## (a) Current

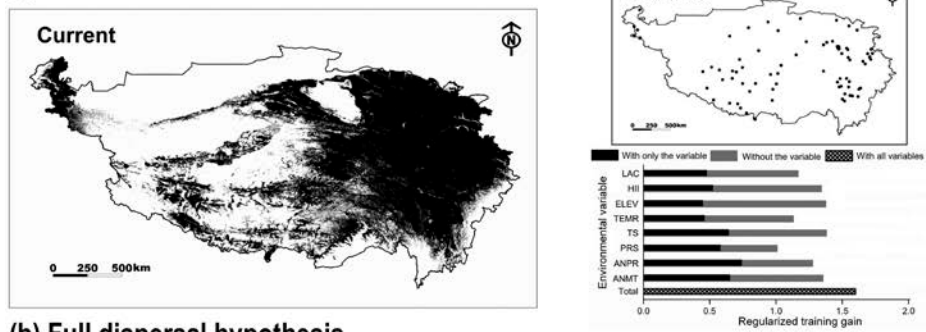

## (b) Full dispersal hypothesis

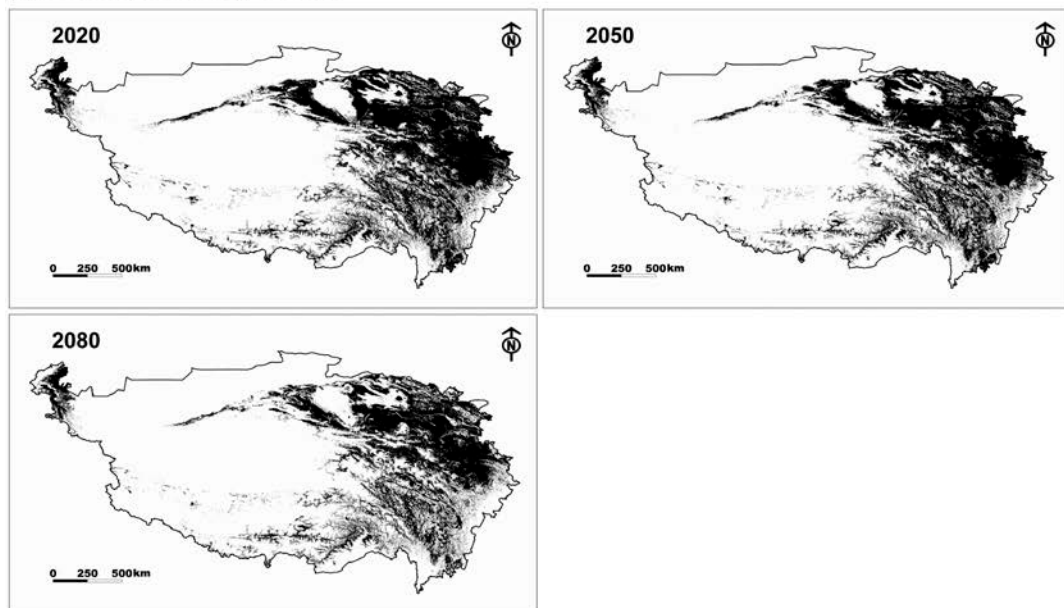

## (c) Zero dispersal hypothesis

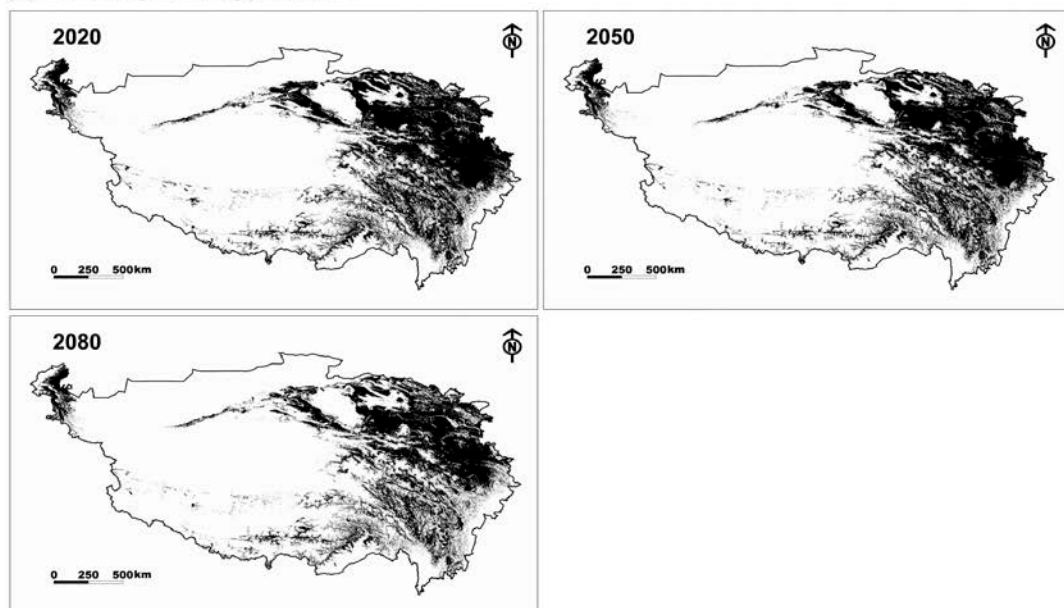

FIG. B16. Occurrence records, Jack-knife analysis, and potential current and future distributions under full and zero dispersal hypotheses of Argali (*Ovis ammon*).

# Chiru (*Pantholops hodgsonii*)

## (a) Current

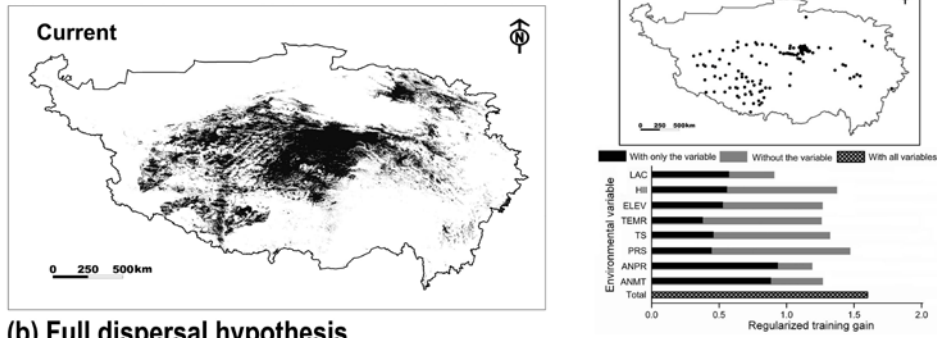

## (b) Full dispersal hypothesis

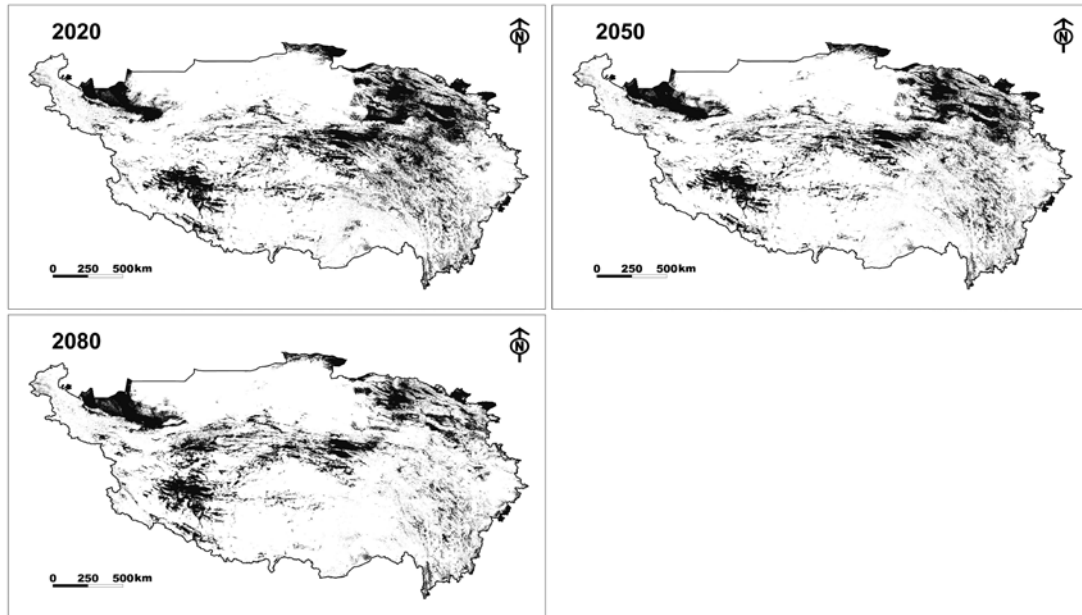

## (c) Zero dispersal hypothesis

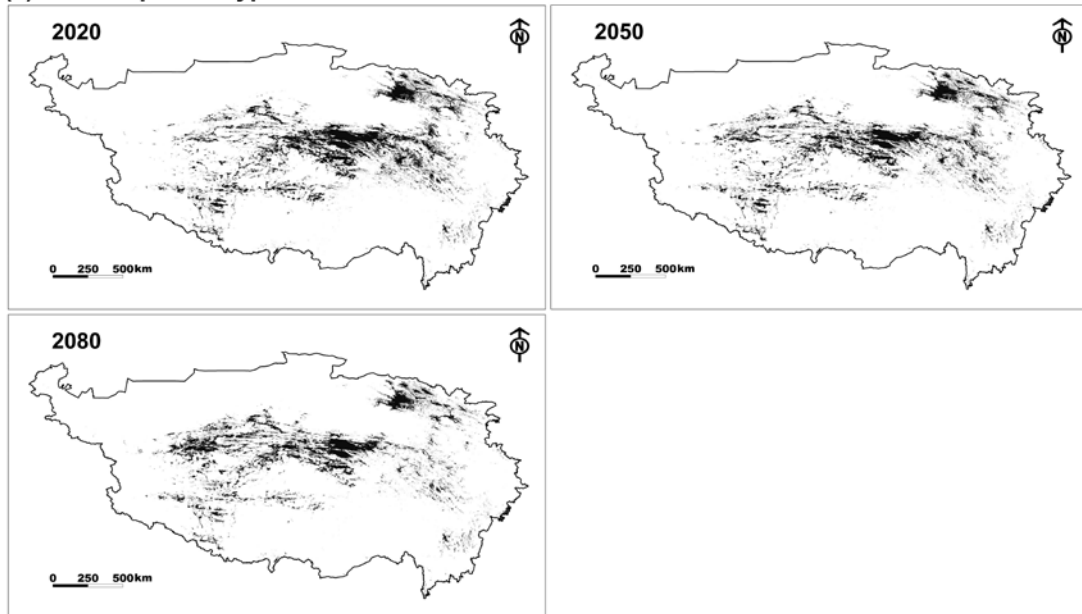

FIG. B17. Occurrence records, Jack-knife analysis, and potential current and future distributions under full and zero dispersal hypotheses of chiru (*Pantholops hodgsonii*).

# Tibetan gazelle (*Procapra picticaudata*)

## (a) Current

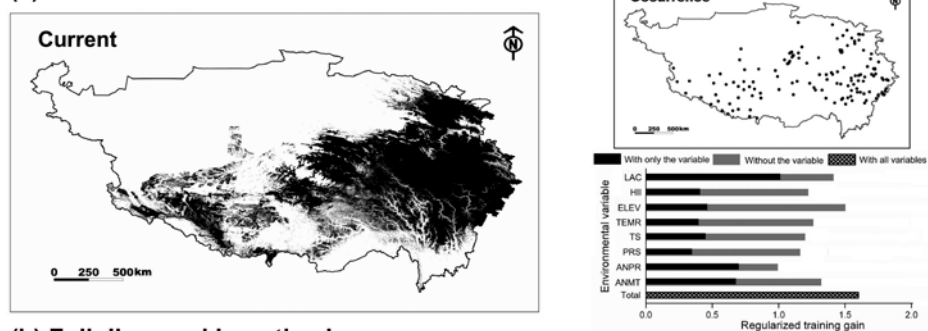

## (b) Full dispersal hypothesis

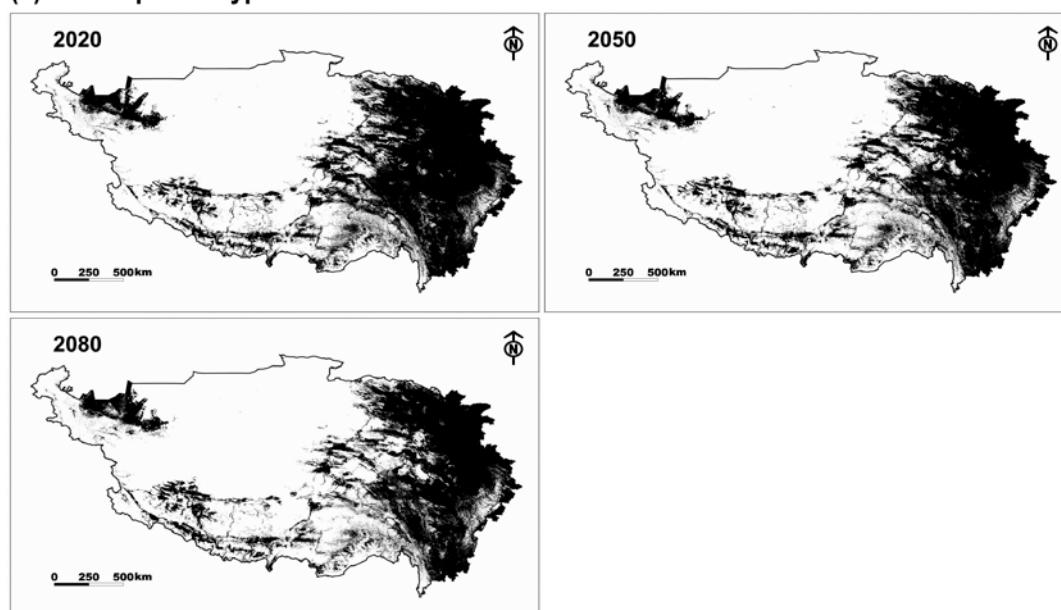

## (c) Zero dispersal hypothesis

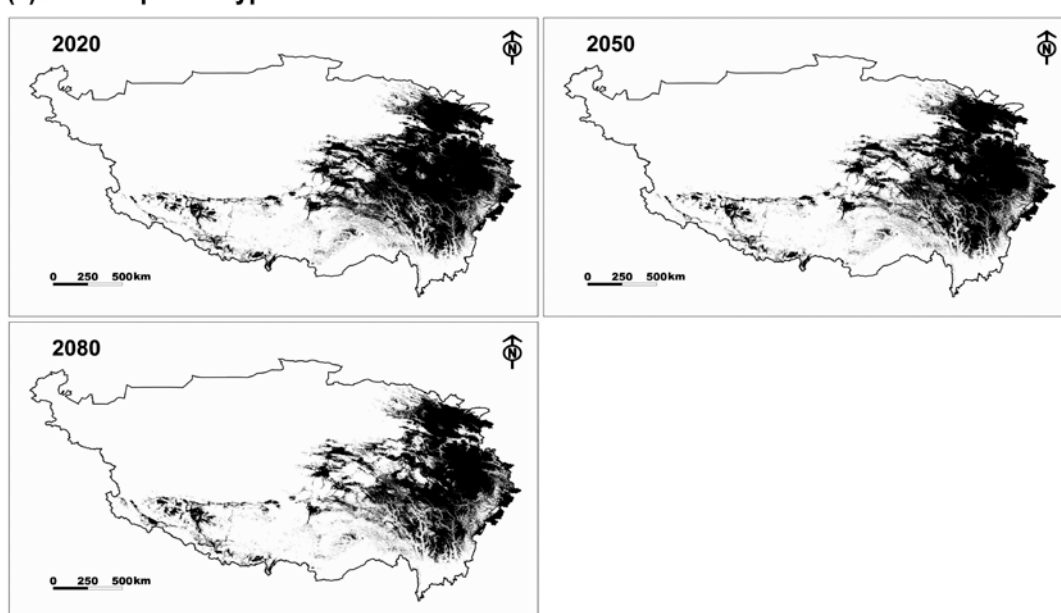

FIG. B18. Occurrence records, Jack-knife analysis, and potential current and future distributions under full and zero dispersal hypotheses of Tibetan gazelle (*Procapra picticaudata*).

# Przewalski's gazelle (*Procapra przewalskii*)

## (a) Current

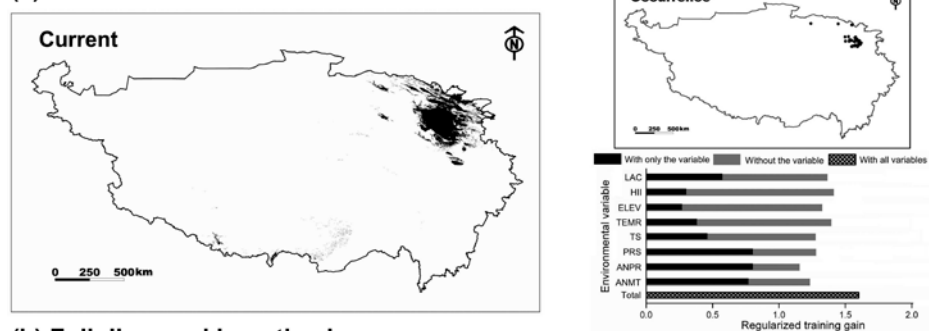

## (b) Full dispersal hypothesis

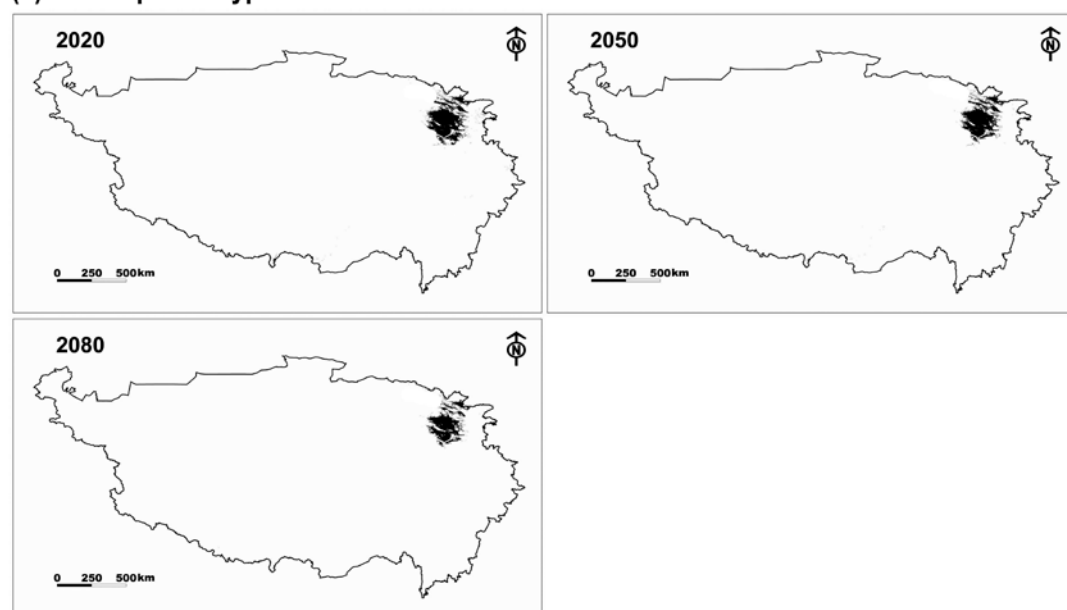

## (c) Zero dispersal hypothesis

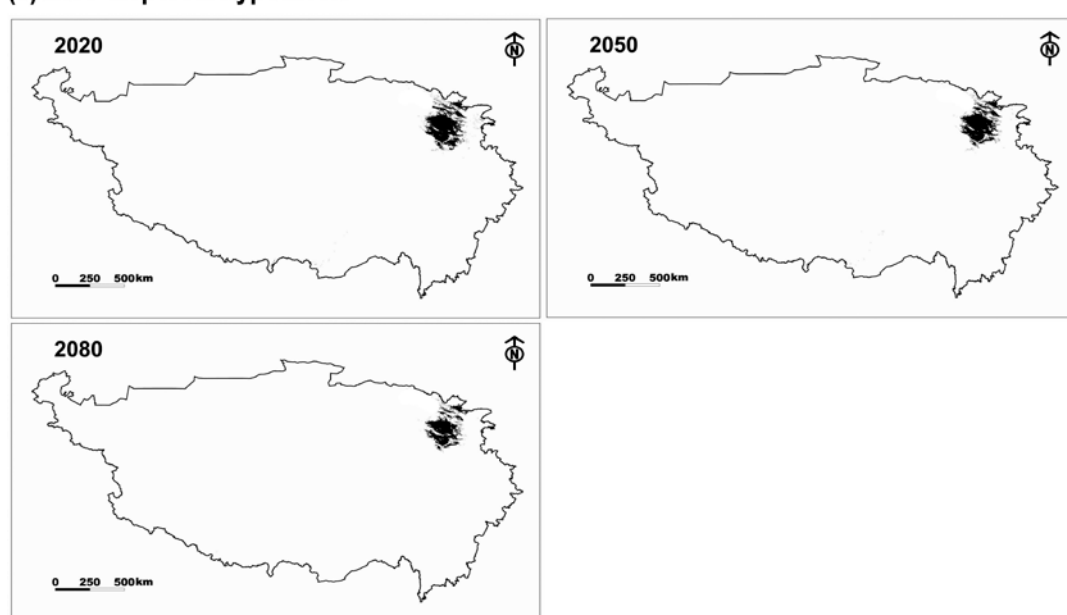

FIG. B19. Occurrence records, Jack-knife analysis, and potential current and future distributions under full and zero dispersal hypotheses of Przewalski's gazelle (*Procapra przewalskii*).

# **Bharal (*Pseudois nayaur*)**

## **(a) Current**

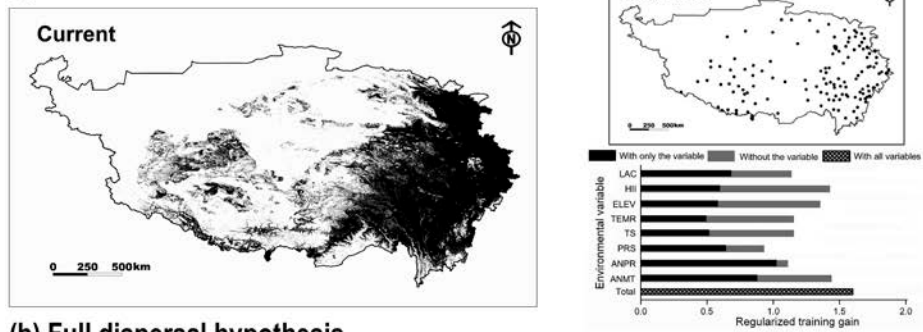

## **(b) Full dispersal hypothesis**

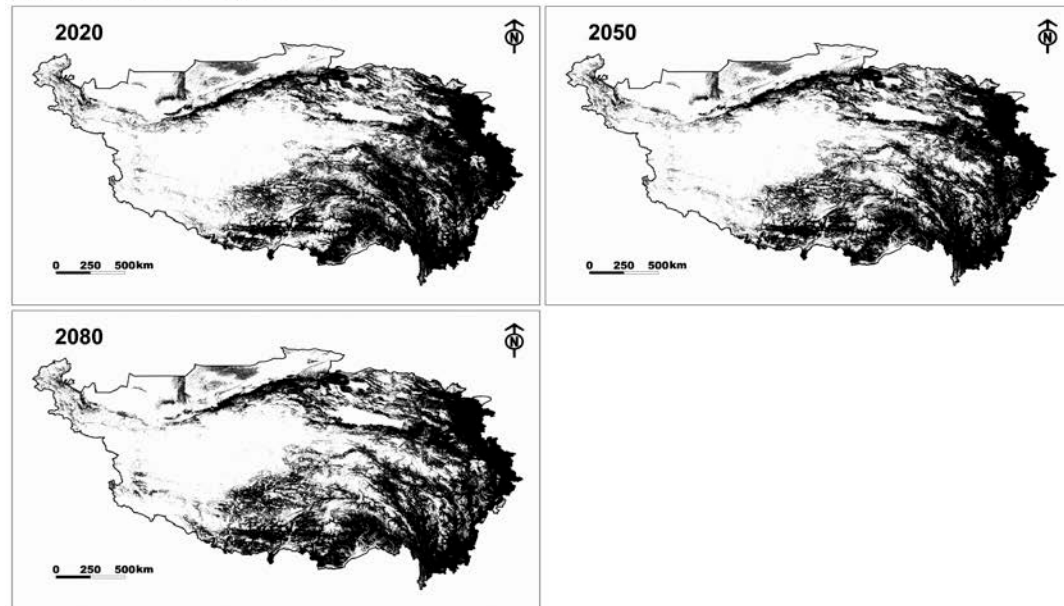

## **(c) Zero dispersal hypothesis**

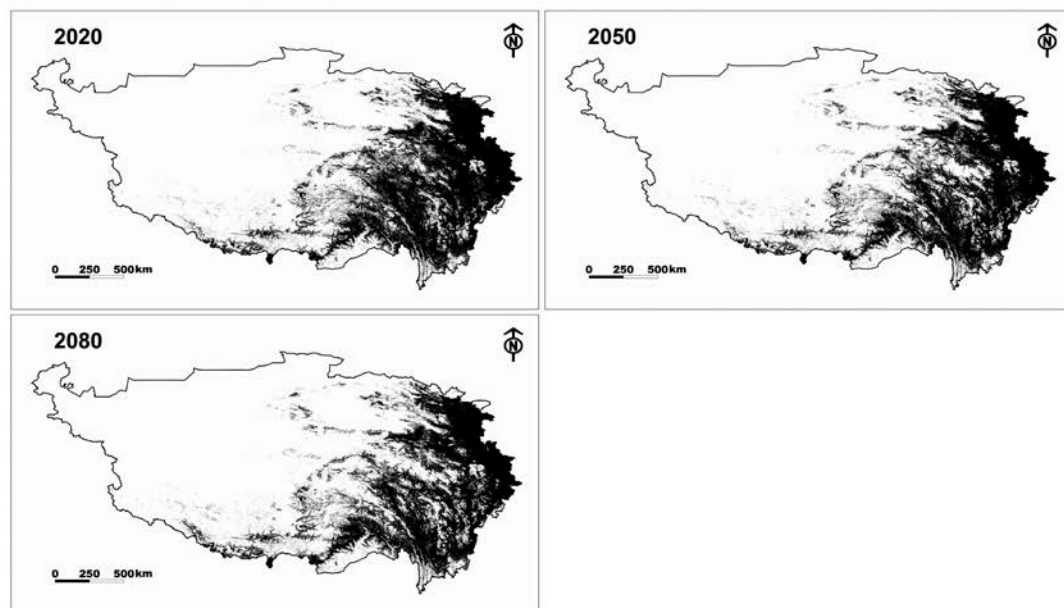

FIG. B20. Occurrence records, Jack-knife analysis, and potential current and future distributions under full and zero dispersal hypotheses of bharal (*Pseudois nayaur*).

# Dwarf bharal (*Pseudois schaeferi*)

## (a) Current

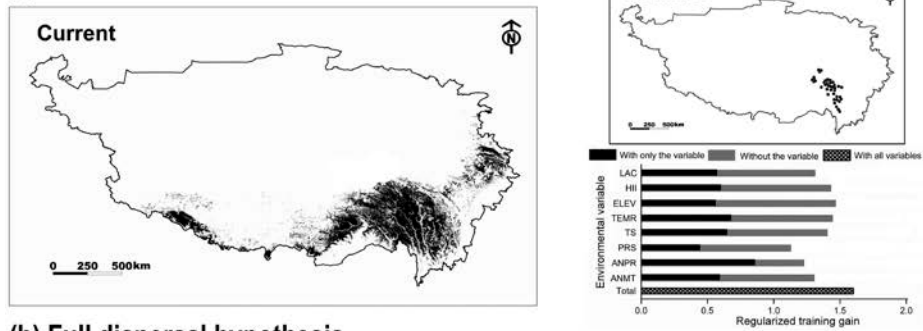

## (b) Full dispersal hypothesis

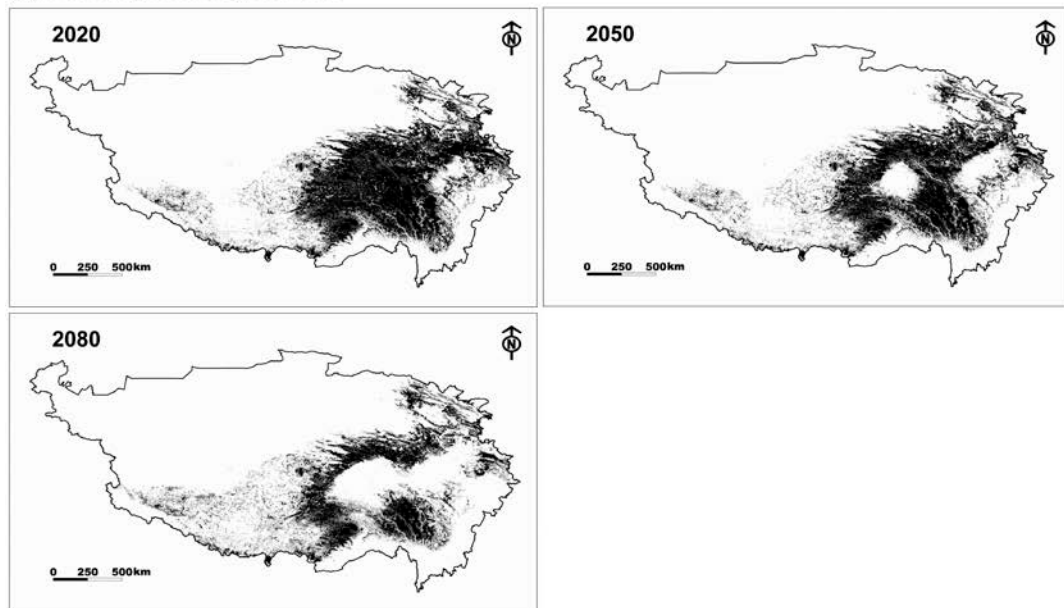

## (c) Zero dispersal hypothesis

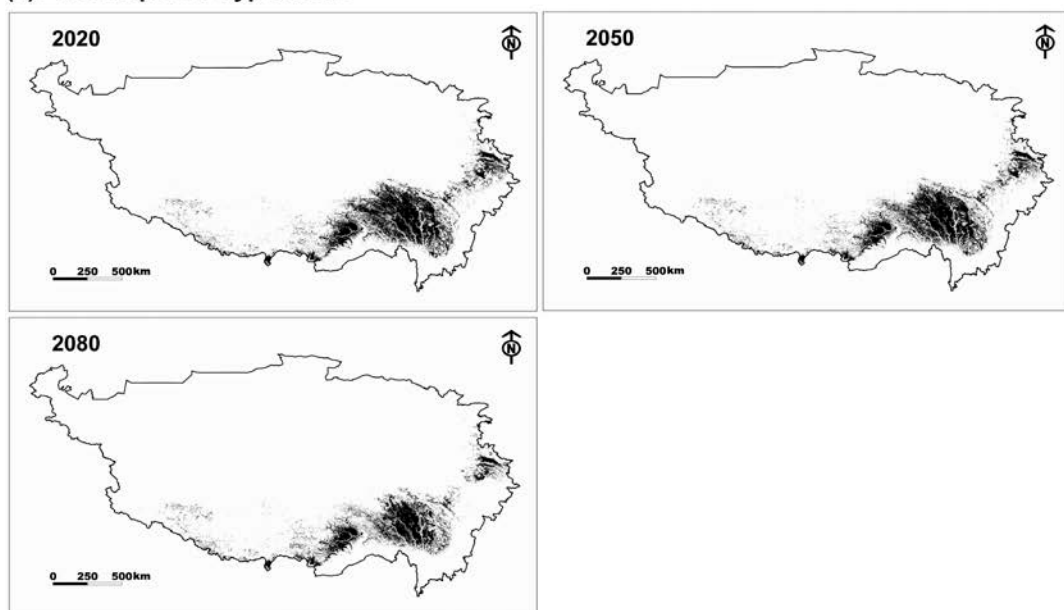

FIG. B21. Occurrence records, Jack-knife analysis, and potential current and future distributions under full and zero dispersal hypotheses of dwarf bharal (*Pseudois schaeferi*).

# Wild boar (*Sus scrofa*)

## (a) Current

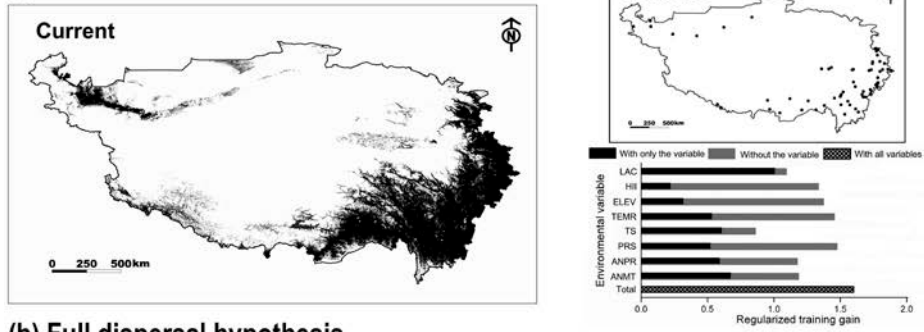

## (b) Full dispersal hypothesis

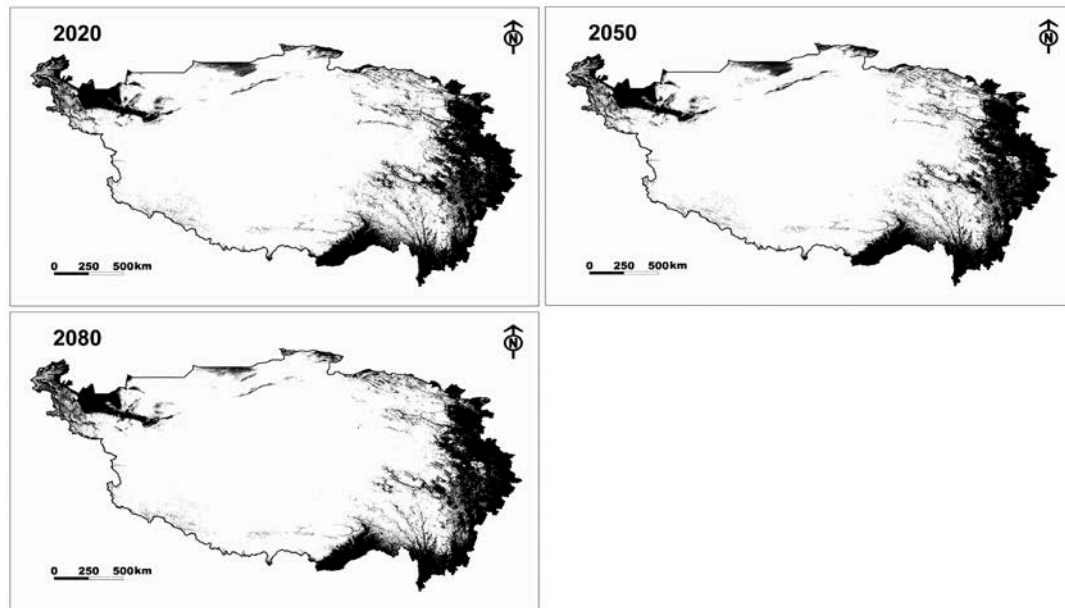

## (c) Zero dispersal hypothesis

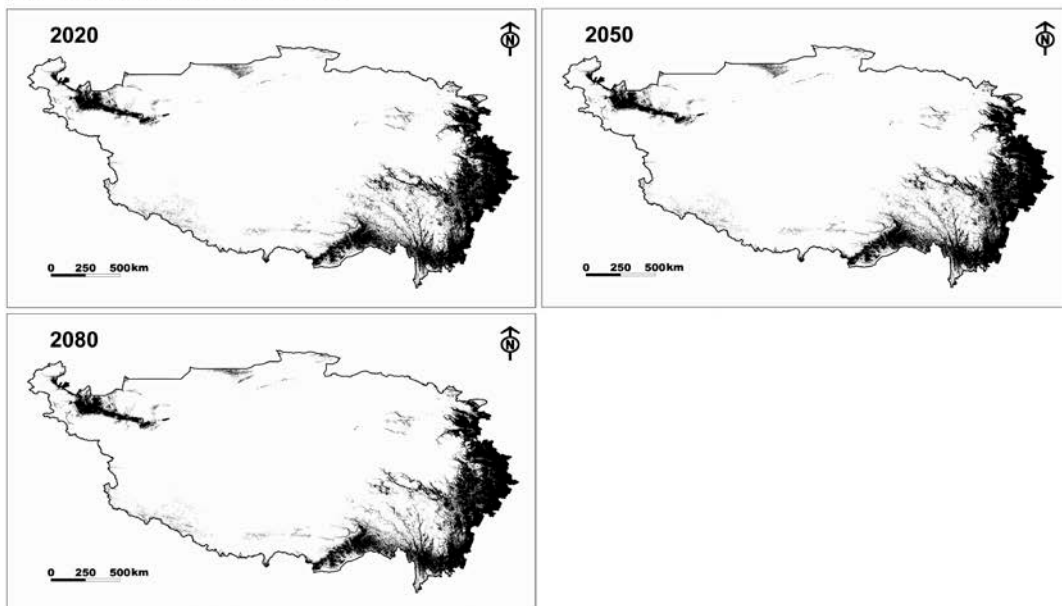

FIG. B22. Occurrence records, Jack-knife analysis, and potential current and future distributions under full and zero dispersal hypotheses of wild boar (*Sus scrofa*).
